# Supplementary material for: Moment magnitude estimates for Central Anatolian earthquakes using coda waves
Source: Copernicus journal article supplement (doi:10.5194/se-2019-8), 2019-01-21
Supplement: Supplementary file [file se-2019-8-AC3-supplement.pdf]

## Responses to reviewer 2

---

**Manuscript No.: SE-2019-8**

---

**Reviewer 2:** In this work, the author uses a multiple-scattering approach to infer the source spectra of small to moderate earthquakes recorded in central Anatolia using the observed energy envelopes of seismograms. The method, originally developed by Sens-Schoenfelder and Wegler (2006), is based on isotropic, scalar radiative transfer theory and makes use of a generalized inversion technique. The author obtains source spectra that are generally well fitted by the classical omega-squared source spectrum for the largest one. For smaller events, there is considerably more scatter in the exponent of the spectral decay at high frequency. The author shows that there exists a reasonably good correspondence between the local Magnitude  $M_L$  and the coda-derived moment magnitude. I think that the study confirms the overall interest in using coda waves to study the source of small earthquakes. It also suggests that the physics of smaller events might be different from the one of larger earthquakes. The analysis is sound and the study will be useful to convert local magnitudes to moment magnitudes in future investigations of the area. Therefore, I support the publication of the manuscript after the following questions/points have been addressed.

**T.E:** I appreciate for your very detailed reading and for positive encouraging opinion now about this study. The annotated text that you provided as supplementary figure among your revision process was too helpful in improving the text since I could correct several typos, rephrase unclear statements in this way. Below you can find my opinion corresponding to the issues you have raised and necessary corrections based on your comments. I have highlighted all changes in red color in the main text.

**Reviewer 2:** In introduction, I would suggest to distinguish more clearly between parametric approaches (such as the one developed by Mayeda and co-workers) and physics-based approaches (Wegler and co-workers). In the present version, what distinguishes the two methods is not really clear.

**T.E.:** We are thankful the reviewer for his careful reading this part. We can understand unclear points and performed some modification to enhance this part of the text.

**Reviewer 2:** It is written that the method of Wegler does not rely on coda normalization. I think that this is an overstatement: although the authors do not explicitly “coda-normalize” their data, I still think that the separation of source and site effects still relies heavily on the fact that at long lapse-time in the coda, the energy distribution homogenizes spatially. If I am mistaken, please explain why.

**T.E.:** Reviewer is partly correct because usually coda-normalization may fail for smaller events since the use of shorter coda waves in this case does not satisfy the requirement of homogeneous distribution of energy in space. This is mainly due to the fact that the presence of random seismic noise can dominate coda part. We avoid such shortcoming by involving source excitation and site amplification terms directly in the inversion process.

**Reviewer 2:** I would recommend to split section 2 into two sections: Geology on the one hand and Data on the other hand.

**T.E.:** I implemented this suggestion. Additionally, based on the suggestion of reviewer 1, I shortened the geology section by leaving out redundant amount of knowledge in this section.

**Reviewer 2:** In the data section, it would be useful to state the final number of utilized paths after applying the selection criteria for the coda.

**T.E.:** This information is now added into the Data section.

**Reviewer 2:** In the Method section, there are a few typos in the Eqs, please verify. I would recommend to explain how  $g$  is updated in the inversion process. Furthermore, I think that it would be useful to discuss the possible trade-offs among the unknown in the system of Eqs (4).

**T.E.:** I thank reviewer 2 for his highlighting a few typos in related equations. They are corrected now. In a response to the reviewer #1, I have added analytical expression of Green's function to clarify its dependence on the scattering attenuation parameter  $g$ . I explain the stepwise procedure about how the parameter  $g$  is updated between lines # 212-218 (new manuscript). However, I should also notice that preferred to give a summarized version of the inversion strategy in this manuscript and tried to avoid going into too many details about attenuation parameter estimation in the manuscript mainly since the current work is just an application of a coda modeling approach previously developed by Sens-Schönfelder and Wegler (2006) and later modified by Eulenfeld and Wegler (2016) and secondly the main focus of the current work is on the source parameter estimation. I also added an explanation about possible trade-offs (lines# 206-210).

**Reviewer 2:** In the studied area, I imagine that there are strong lateral variations of geology and therefore that the scattering coefficient depends on the source station pair. Is this taken into account in your inversion? If so, could you comment on the spatial variations of  $g$  in the studied area?

**T.E:** We appreciate reviewer for raising this point. The reviewer 2 is right about lateral heterogeneities in the study region. To consider this I specifically classified station-event pairs into two regional groups: those lying within Kırşehir Block and within Anatolide-

Tauride Block that are separated by the Central Anatolia Fault System. However, I should also notice that the approach used here does not require a priori knowledge of scattering and intrinsic attenuation. Resultant attenuation terms estimated following the simultaneous inversion procedure indicated an overall dominance of intrinsic attenuation over scattering one. A detailed discussion will be the out of our scope in the present study but certainly will be subject to future work that will be primarily focusing on crustal heterogeneities based on lateral variation of anelastic attenuation properties of the study region.

**Reviewer 2:** Is Figure 4 discussed somewhere in the text? I could not find. If the Figure is not useful, you should suppress it. If it contains information, please discuss it more carefully.

**T.E.:** This issue was earlier pointed out by reviewer 1 and it stems from a mistake when citing Figure 5. I already corrected this. Figure 4 is now also cited properly in the revised version of the text.

**Reviewer 2:** On L.250 and elsewhere, it is said that the radiation pattern has only a minor influence on the coda, an assertion with which I agree on the whole. Nevertheless, the separation of scattering and absorption also uses the energy contained the coherent wave which is strongly affected by the radiation pattern. If you have used techniques such as MLTWA in the past, you have probably observed that the largest fluctuations in the data occur in the window containing the ballistic wave. Therefore, it is not completely clear to me how the radiation pattern affects the data inversion. Could you comment on this point?

**T.E.:** The source radiation pattern is ignored in this assumption since averaging effect of multiple-scattering process ceases its effect on the S-wave coda. However it could be still influential on direct S wave portion in a way by altering attenuation estimates in cases of poor azimuthal coverage of station distribution with respect to earthquakes. In our case, the seismic network used in this study has relatively good azimuthal coverage, and thus direct S-wave measurements averaged over a lot of stations vanish influence of source radiation pattern on the attenuation estimates. The source radiation patterns, for example, will probably have a minor effect on our results because in the late coda the effect vanishes due to the averaging by multiple scattering and the direct S-wave is measured and averaged over a lot of stations.

# 1 **Moment magnitude estimates for Central Anatolian earthquakes using coda waves**

2 Tuna Eken<sup>1</sup>

3

4 <sup>1</sup>*Department of Geophysical Engineering, the Faculty of Mines, Istanbul Technical*

5 *University, 34469 Maslak, Sariyer, Istanbul, Turkey*

6

7 *Abstract*

8 Proper estimate of moment magnitude that is a physical measure of the energy released at  
9 earthquake source is essential for better seismic hazard assessments in tectonically active  
10 regions. Here a coda wave modeling approach that enables the source displacement spectrum  
11 modeling of examined event was used to estimate moment magnitude of central Anatolia  
12 earthquakes. To achieve this aim, three component waveforms of local earthquakes with  
13 magnitudes  $2.0 \leq M_L \leq 5.2$  recorded at ~~72~~ 69 seismic stations which have been operated  
14 between 2013 and 2015 within the framework of the CD-CAT passive seismic experiment  
15 were utilized. An inversion on the coda wave traces of each selected single event in our  
16 database was performed in five different frequency bands between 0.75 and 12 Hz. Our  
17 resultant moment magnitudes ( $M_W$ -coda) exhibit a good agreement with routinely reported  
18 local magnitude ( $M_L$ ) estimates for the study area. Apparent move-out that is, particularly,  
19 significant around the scattered variation of  $M_L$ - $M_W$ -coda data points for small earthquakes  
20 ( $M_L < 3.5$ ) can be explained by possible biases of wrong assumptions to account for anelastic  
21 attenuation and of seismic recordings with finite sampling interval. Finally, we present an  
22 empirical relation between  $M_W$ -coda and  $M_L$  for central Anatolian earthquakes.

23

24 Keyword(s): Coda waves modelling, seismic moment, moment magnitude, Radiative Transfer

25 Theory

26        1. *Introduction*

27        The robust and stable knowledge of source properties (e.g. moment magnitude estimates) is  
28        crucial in seismically active countries such as Turkey for a better evaluation of seismic hazard  
29        potential as this highly depends on establishment of reliable seismicity catalogs. Moreover,  
30        accurate information on source parameters could be important when developing regional  
31        attenuation properties.

32

33        Conventional type of magnitude scales ( $M_L$ ,  $m_b$ ,  $M_S$ ) as the result of empirically derived using  
34        direct wave analyses can be biased due to various effects such as source radiation pattern,  
35        directivity, and heterogeneities along the path since they may cause drastic changes in direct  
36        wave amplitude measurements (e.g., Favreau and Archuleta, 2003). Instead several early  
37        studies depending on the analysis of local and/or regional coda envelopes have indicated that  
38        coda wave amplitudes are significantly less variable by a factor of 3-to-5 compared to direct  
39        wave amplitudes (e.g., Mayeda and Walter, 1996; Mayeda et al., 2003; Eken et al., 2004;  
40        Malagnini et al., 2004; Gök et al., 2016). In fact local or regional coda waves that are usually  
41        considered to be generally ~~to be~~ composed of scattered waves. ~~and can~~ These wave trains ~~can~~  
42        be simply explained by ~~that sample~~ the single scattering model of Aki (1969) ~~which~~ have  
43        been proven to be virtually insensitive to any source radiation pattern effect in contrast to  
44        direct waves ~~because of due to~~ the volume averaging property of the coda waves sampling the  
45        entire focal sphere (e.g., Aki and Chouet, 1975; Rautian and Khalturin, 1978). In Sato and  
46        Fehler (1998) and Sato et al. (2012) an extensive review study on the theoretical background  
47        of coda generation and advances of empirical observations and modelling efforts can be found  
48        in details.

49

50 There have been several approaches used for extracting information on earthquake source size  
51 via coda wave analyses. These approaches can be mainly divided into two groups. The first  
52 group of studies ~~can be considered as the parametric approach and essentially employs~~ coda  
53 normalization strategy in which measurements require a correction for ~~empirically derived~~  
54 ~~quality factors representing~~ seismic attenuation parameters (e.g. intrinsic and scattering) ~~that~~  
55 ~~can be described by some empirical quality factors~~. In this case, ~~To calibrate the adjustment~~  
56 ~~of~~-final source properties ~~are achieved with the help of some~~ reference events ~~whose seismic~~  
57 ~~moments are previously estimated based on waveform inversion methods. are used to adjust~~  
58 ~~measurements with respect to each other~~. For forward generation of synthetic coda envelopes,  
59 either single-backscattering or more advanced multiple-backscattering approximation are  
60 used. An example to this group is an empirical method originally developed by Mayeda et al.  
61 (2003) to investigate seismic source parameters such as energy, moment, and apparent stress  
62 drop in the western United States and in Middle East. They corrected observed coda  
63 envelopes for various influences, for instance, path effect, S-to-coda transfer function, site  
64 effect, and any distance-dependent changes in coda envelope shape. Empirical coda envelope  
65 method have been successfully applied to different regions with complicated tectonics such as  
66 northern Italy (e.g. Morasca et al., 2008), Turkey and Middle East (e.g. Eken et al., 2004; Gök  
67 et al. 2016); or Korean Peninsula (e.g. Yoo et al., 2013).

68  
69 Second type of approach ~~depends on estimating source and structural properties through a~~ is a  
70 joint inversion technique. This technique employs ~~that is based on~~ a simultaneous  
71 optimization of source, path, and site specific terms via a ~~fitting procedure between physically~~  
72 ~~derived~~ synthetic ~~coda envelope~~ and observed coda envelope ~~fitting~~ within a selected time  
73 window ~~including that includes both the~~ observed coda and direct-S wave parts. ~~Although the~~  
74 ~~conventional coda-normalization method essentially relies on the correction for undesired~~

75 effects of the source and site amplifications, it may fail for small events with a shorter coda.  
76 This mainly stems from random seismic noise that dominates the coda, which does not satisfy  
77 the requirement of homogeneous distribution of energy in space. In the present study, we  
78 avoid this shortcoming by involving source excitation and site amplification terms in the  
79 inversion process. ~~In this approach,~~ To achieve this, the Radiative Transfer Theory (RTT) is  
80 employed for analytic expression of synthetic coda wave envelopes. The method ~~that does not~~  
81 ~~rely on coda normalization strategy~~ was originally developed by Sens-Schönfelder and  
82 Wegler (2006) and successfully tested on local and regional earthquakes ( $4 \leq M_l \leq 6$ ) detected  
83 by the German Regional Seismic Network. Further it has been applied to investigate source  
84 and frequency dependent attenuation properties of different geological settings, i.e., Upper  
85 Rhine Graben and Molasse Basin regions in Germany and western Bohemia/Vogtland in  
86 Czechia (Eulenfeld and Wegler, 2016); entire United States (2017); central and western  
87 North Anatolian Fault Zone (Gaebler et al., 2018; Izgi et al., 2018). A more realistic earth  
88 model in which anisotropic scattering conditions were earlier considered by Gusev and  
89 Abubakirov (1987) yielded peak broadening effects of the direct seismic wave arrivals. This  
90 approach ~~later was used in previous studies (e.g. Zeng, 1993; Przybilla and Korn, 2008;~~  
91 ~~Gaebler et al., 2015)~~ that ~~examines dealt with the~~ propagation of P-wave elastic energy and  
92 the effect of conversion between P- and S-wave energies was later used in Zeng and Aki  
93 (1991) ~~1993, Przybilla and Korn (2008), Gaebler et al. (2015).~~

94  
95 In the current work I present estimated source spectra as ~~an the~~ output of a joint inversion of  
96 S- and coda waves parts ~~of~~ extracted from ~~local earthquake waveforms~~ 487 local earthquakes  
97 with magnitudes  $2.0 < M_l < 4.5$  detected in central Anatolia ~~for their source parameters~~. The  
98 approach used here employs isotropic acoustic RTT approach for forward calculation of  
99 synthetic coda envelopes. Gaebler et al. (2015) ~~have has~~ observed that modeling results from

100 isotropic scattering were almost comparable with those inferred from relatively more complex  
101 elastic RTT simulations with anisotropic scattering conditions. The use of a joint inversion  
102 technique is advantageous since it is insensitive to any potential bias, which could be  
103 introduced by external information, i.e., source properties of a reference that is obtained  
104 separately from other methods for calibration. This is mainly because of the fact that we  
105 utilize an analytical expression of physical model involving source, and path related  
106 parameters to describe the scattering process. Moreover the type of optimization during joint  
107 inversion enables the estimates for source parameters of relatively small sized events  
108 compared to the one used in coda-normalization methods.

109

## 110 2. *Regional Setting ~~and Data~~*

111 Present tectonic setting of Anatolia and surrounding regions have been mainly **the** outcome of  
112 the northward converging movements among Africa, Arab, and Eurasian plates. To the west,  
113 **the** subducting African plate with a slab roll-back dynamics beneath Anatolia along Hellenic  
114 Trench has led to back-arc extension in the Aegean and western Anatolia, while  
115 compressional deformation to the east around the Bitlis–Zagros suture was explained by  
116 collisional tectonics (e.g. Taymaz et al., 1990; Bozkurt, 2001) (Fig. 1). Central Anatolia is  
117 located between **an** extensional regime to the west due to the subduction, and **a** compressional  
118 regime **tectonics** to the east due to the collisional tectonics. There are several fault systems  
119 responsible for ongoing seismic activity in the region. The major fault zone, the Central  
120 Anatolian Fault Zone (CAFZ) (Fig. 2), which primarily represents a transtensional fault  
121 structure with **a** small amount of left-lateral offset during the Miocene (e.g. Koçyiğit and  
122 Beyhan, 1998), can be considered as a boundary between the carbonate nappes of the  
123 Anatolide-Tauride block ~~from~~ **and** the highly deformed and metamorphosed rocks in the  
124 Kırşehir block. To the northwest of the CAFZ, Tuz Gölü Fault Zone (TGFZ) (Fig. 2), which



125 is characterized by a right-lateral strike slip motion with a significant oblique-slip normal  
126 component, appears to be collocated with the Tuz Gölü Basin sedimentary deposits as well as  
127 the crystalline rocks within the Kırşehir Block (e.g. Çemen et al., 1999; Bozkurt et al., 2001;  
128 Taymaz et al., 2004; Çubuk et al., 2014). At the southwest tip of the study region, the EAFZ  
129 generates large seismic activity that can be identified by rather complicated seismotectonic  
130 setting: predominantly left-lateral strike-slip motion that is well correlated well with the  
131 regional deformation pattern but also and with existing local clusters of thrust and normal  
132 faulting events on NS- and EW-trending subsidiary faults, respectively (Bulut et al., 2012).  
133 Such complicated behavior explains kinematic models (e.g. Riedel shear, anti-Riedel shear  
134 models) of the shear deformation zone evolution (Tchalenko, 1970). It connects to the NAFZ  
135 at the Karlıova Triple Junction (Bozkurt, 2001) and to the south splits into various segments  
136 nearby the Adana Basin (Kaymakci et al., 2006) (Fig. 2). Toward the south, the EAFZ reaches  
137 the Dead Sea Fault Zone (DSFZ) that has a key role in accommodating northward relative  
138 motions of Arabian and African Plates with respect to Eurasia.

139

### 140 *3. Data*

141 The present work utilizes three-component waveforms of local seismic activity detected at 72  
142 broadband seismic stations (Fig. 2) that have been operated for 2 years between 2013 and  
143 2015 within the framework of a temporary passive seismic experiment, the Continental  
144 Dynamics–Central Anatolian Tectonics (CD-CAT) (Portner et al., 2018). We benefit from  
145 revisited standard earthquake catalogue information that is routinely released by the Kandilli  
146 Observatory and Earthquake Research Institute (KOERI) (publicly available at  
147 <http://www.koeri.boun.edu.tr>) to extract waveform data for a total of 2231 examined events  
148 with station-event pair distance less than 120 km and focal depths less than 10 km. Most of  
149 the detected seismic activity in the study area is associated to several fault zones in the region,

150 i.e., the EAFZ, CAFZ, DSFZ, TGFZ, etc. Here we note that ~~selection~~ the use of only local  
151 earthquakes is to exclude possible biases, which may be introduced by Moho boundary  
152 guided Sn-waves. ~~while~~ Upper crustal earthquakes ~~with less than 10 km focal depths~~ are  
153 preferred in this study to exclude effect of relatively large-scale heterogeneities on coda wave  
154 trains. ~~Finally~~ ~~Additionally~~, we ~~performed~~ a visual inspection ~~conducted~~ over all waveforms  
155 to ensure high-quality waveforms. ~~and this reduces~~ Our final event number ~~reduced~~ to 1193.  
156 Selected station and event distributions can be seen in Figure 2.

157

158 Observed waveforms were prepared at 5 different frequency bands with central frequencies at  
159 0.75, 1.5, 3.0, 6.0, 12.0 Hz via a Butterworth band-pass filtering process. In the next step, we  
160 applied Hilbert transform to filtered waveform data in order to obtain the total energy  
161 envelopes. An average crustal velocity model was used to predict P and S wave onsets on  
162 envelopes and then based on this information: (i) the noise level prior to the P-wave onset was  
163 eliminated (ii) S-wave window was determined starting at 3s prior to and 7 s afterwards S-  
164 wave onset as this allowed to include all direct S-wave energy, (iii) starting at the end of the  
165 S-wave window, a coda window of 100s at maximum was determined. Length of coda  
166 windows can be shorter when signal-to-noise ratio (SNR) is less than 2.5. ~~If there are or when~~  
167 ~~the same window consists of there are~~ coda waves from two earthquakes (e.g. because of an  
168 ~~aftershock sequence~~) within the same analysis window, which can ~~give rise to~~ can cause  
169 ~~another rise instead of a decline in the envelope~~. We omit the earthquakes with less than 10 s  
170 of coda length from our database. ~~Taking into account of these criteria, finally coda~~  
171 ~~waveforms extracted from 6541 source-receiver pairs were used for further data process.~~

172

173

174

175 4. Method

176 We adopted an inversion procedure that was originally developed by Sens-Schönfelder and  
 177 Wegler (2006) and later modified by Eulenfeld and Wegler (2016). The forward part, which  
 178 involves calculation of energy density for a specific frequency band ~~caused by~~ under  
 179 ~~assumption of~~ an isotropic source, is expressed in Sens-Schönfelder and Wegler (2006) as  
 180 follows:

$$181 \quad E_{mod}(t, r) = WR(r)G(t, r, g)e^{-bt} \quad (1)$$

182  
 183 where  $W$  gives source term and it is frequency dependent.  $R(r)$  indicates the energy site  
 184 amplification factor and  $b$  is intrinsic attenuation parameter.  $G(t, r, g)$  represents Green's  
 185 function that includes scattered wave field as well as direct wave and its expression is given  
 186 by Paasschens (1997) as follows:

$$187 \quad G(t, r, g) = e^{(-v_0 t g_0)} \left[ \frac{\delta(r - v_0 t)}{4\pi r^2} + \left( \frac{4\pi v_0}{3g_0} \right)^{-\frac{3}{2}} t^{-\frac{3}{2}} \times \left( 1 - \frac{r^2}{v_0^2 t^2} \right)^{\frac{1}{8}} K \left( v_0 t g_0 \left( 1 - \right. \right. \right. \\ 188 \left. \left. \left. \frac{r^2}{v_0^2 t^2} \right)^{\frac{3}{4}} \right) H(v_0 t - r) \right] \quad (2)$$

189 Here the term within Dirac delta function represents direct wave and other term indicates  
 190 scattered waves.  $v_0$  describes the mean S-wave velocity while  $g_0$  is the scattering coefficient.

191 Possible discrepancy between predicted (Eq. 1) and observed energy densities for each event  
 192 at each station with  $N_{ij}$  time samples (index  $k$ ) in a specific frequency band can be minimized  
 193 using:

$$194 \quad \epsilon(g) = \sum_{i,j,k}^{N_S, N_E, N_{ij}} (\ln E_{ijk}^{obs} - \ln E_{ijk}^{mod}(g))^2 \quad (3)$$

196

197 Here, the number of stations (index  $i$ ) and events (index  $j$ ) are shown by  $N_S$  and  $N_E$ ,  
198 respectively. Optimization of  $g$  will be achieved by fulfilling following equalities:

199

$$200 \quad \ln E_{ijk}^{obs} = \ln E_{ijk}^{mod} \quad (4) \quad \text{or}$$

201

$$202 \quad \ln E_{ijk}^{obs} = \ln G(t_{ijk}, r_{ijk}, g) + \ln R_i + \ln W_j - bt_{ijk} \quad (5)$$

203 Equation 5 simply define an overdetermined inversion problem with  $\sum_{i,j} N_{ij}$  number equation  
204 systems and with  $N_S + N_E + 1$  variables and thus  $b$ ,  $R_i$ , and  $W_j$  can be solved via a least-  
205 squares technique.  $\epsilon(g)$  can be defined as sum over the squared residuals of the solution. As  
206 can be seen from equation 1 that there is an obvious trade-off between  $R_i$  and  $W_j$ , which we  
207 can manage by fixing the geometrical mean of  $R_i$  to 1 ( $\Pi R_i = 1$ ). Equation 1 also implies  
208 rather moderate trade-off between  $W_j$  and  $b$ . Trade-off between  $g$  and other inverted  
209 parameters are usually small since this parameter is fixed through the energy ratio of the  
210 direct S-wave and the level of the coda-waves (Gaebler et al., 2018).

211 Eulenfeld and Wegler (2016) present a simple recipe to perform the inversion:

212 (i) Calculate Green's functions through the analytic approximation of the solution for 3-D  
213 isotropic radiative transfer (e.g. Paasschens 1997; Sens-Schönfelder and Wegler, 2006) by  
214 using fixed scattering parameters and minimize equation 5 to solve for  $b$ ,  $R_i$ , and  $W_j$  via a  
215 weighted least-squares approach.

216 (ii) Calculate  $\epsilon(g)$  using equation 3.

217 (iii) Repeat (i) and (ii) by selecting different  $g$  to find the optimal parameters  $g$ ,  $b$ ,  $R_i$  and  $W_j$

218 that finally minimize the error function  $\epsilon$ .

219 In Fig. 3 an example for the minimization process that was applied at five different frequency  
220 bands is displayed for one selected event at recorded stations of the CD-CAT project.

221 Minimization described above for different frequencies will yield unknown spectral source  
222 energy term,  $W_j$  as well as site response,  $R_i$  and attenuation parameters,  $b$ , and  $g$  that will  
223 satisfy optimal fitting between observed and predicted coda wave envelopes. Example for this  
224 fitting can be seen in Figure 4. The present study deals with frequency dependency of  $W_j$   
225 since this information can be later useful to obtain source displacement spectrum and thus  
226 seismic moment and moment magnitudes of analyzed earthquakes using the formula of the  $S$ -  
227 wave source displacement spectrum for a double-couple source in the far-field, which is given  
228 by Sato et al. (2012):

$$229 \quad \omega M(f) = \sqrt{\frac{5\rho_0 v_0^5 W}{2\pi f^2}} \quad (6)$$

230 where  $W$  indicates the radiated  $S$ -wave energy at a center frequency  $f$  while  $v_0$  and  $\rho_0$   
231 represent the mean  $S$ -wave speed and medium density, respectively.

232 The relation between the obtained source displacement spectrum and seismic moment value  
233 was earlier described in Abercrombie (1995) by:

$$234 \quad \omega M(f) = M_0 \left(1 + \left(\frac{f}{f_c}\right)^n\right)^{-\frac{1}{\gamma}} \quad (7)$$

235 where  $n$  is related to the high-frequency fall-off and  $\gamma$  is known as shape parameter that  
236 controls the sharpness of spectrum at corner frequency between the constant level  $M_0$  (low  
237 frequency part) and the fall-off with  $f^{-n}$  (high frequency part). Taking the logarithm of  
238 equation 7 gives:

239

$$\ln \omega M(f) = \ln M_0 - \frac{1}{\gamma} \ln \left( 1 + \left( \frac{f}{f_c} \right)^{\gamma c} \right) \quad (8)$$

241

242 ~~Eq. 8 describes an optimization problem and left hand side of the equation represents the data~~

243 ~~part that is simply observed source displacement spectrum and left hand side includes four~~

244 ~~source parameters,  $M_0$ ,  $\gamma$ ,  $n$ , and  $f_c$  are the unknown model parameters that can be resolved in~~

245 ~~a simultaneous least-squares inversion of the equation 8. Eq. 8 describes an optimization~~

246 ~~problem where the observed source displacement spectrum data (left-hand side) can be~~

247 ~~inverted for four unknown source parameters,  $M_0$ ,  $\gamma$ ,  $n$ , and  $f_c$  (right-hand side) in a~~

248 ~~simultaneous least-squares inversion scheme. Finally moment magnitude,  $M_w$  can be~~

249 ~~calculated from modeled source parameters, seismic moment,  $M_0$  using a formula given by~~

250 ~~Hanks and Kanamori (1979):~~

251

$$M_w = \frac{2}{3} \log_{10} M_0 - 10.7 \quad (9)$$

253

## 254 *5. Results and Discussions*

### 255 *5.1 Coda wave source spectra*

256 Figure 5 displays observed values of source spectra established by inserting inverted spectral

257 source energy term  $W$  at each frequency in Eq. 6 for all analyzed events. Each curve in this

258 figure represents the model spectrum estimate based on the inversion procedure described in

259 the previous section. Modeled spectrum characteristics computed for 487 local earthquakes

260 whose geographical distribution of which lateral distribution is presented in Figure 2 suggest,

261 in general, that we were able to obtain typically expected source displacement spectrum with

262 a flat region around the low frequency limit and a decaying behaviour above a corner

263 frequency.

264

265 Owing to the multiple-scattering process within small scale heterogeneities that makes coda  
266 waves gain an averaging nature, the variation in coda amplitudes due to differences in source  
267 radiation pattern and path effect are reduced (Walter et al., 1995; Mayeda et al., 2003).  
268 Eulenfeld and Wegler (2016) found that radiation pattern would have only a minor influence  
269 on the S-wave coda while it might disturb attenuation models inferred from the direct S-wave  
270 analyses unless the station distribution relative to the earthquakes indicates a good azimuthal  
271 coverage. ~~A peak-like source function assumption for small earthquakes that are utilized in  
272 the present work was earlier proven to be adequate in early application of the coda-wave  
273 fitting studies (e.g. Sens-Schönfelder and Wegler, 2006; Gaebler et al., 2015; and Eulenfeld  
274 and Wegler, 2016).~~

275

276 Conventional approaches (e.g. Abercrombie, 1995; Kwiatek et al., 2011) to estimate source  
277 parameters such as corner frequency, seismic moment, high-frequency fall-off through fitting  
278 of observed displacement spectra observed at a given station in an inversion scheme could be  
279 misleading since these methods usually: (i) assume a constant value of attenuation effect (no  
280 frequency variation) defined by a factor  $\exp(-\pi ftQ^{-1})$  over the spectrum, (ii) and assume  
281 omega-square model with a constant high-frequency fall-off parameter,  $n=2$ . Following Sens-  
282 Schönfelder and Wegler (2006) and Eulenfeld and Wegler (2016), however, we estimate  
283 attenuation parameters (intrinsic and scattering) separately within a simultaneous inversion  
284 procedure in which high-frequency fall-off parameter varies. This is fairly consistent with  
285 early studies (e.g. Ambeh and Fairhead, 1991; Eulenfeld and Wegler, 2016) where significant  
286 deviations from the omega square model ( $n>3$ ) were reported implying that the omega-square  
287 model as a source model for small earthquakes must be reconsidered in its general  
288 acceptance. Earlier it has been well-observed that the source spectra, especially, for large

289 earthquakes could be better explained by models of two corner frequencies (e.g.,  
290 Papageorgiou and Aki, 1983; Joyner, 1984; Atkinson, 1990). Recently, Denolle et al. (2016)  
291 observed that conventional spectral model of a single-corner frequency and high-frequency  
292 fall-off rate could not explain P wave source spectra of thrust earthquakes with magnitude  
293  $M_w$  5.5 and above. Instead, they suggested the double-corner-frequency model for large  
294 global thrust earthquakes with a lower corner frequency related to source duration and with an  
295 upper corner frequency suggesting a shorter time scale unrelated to source duration, which  
296 exhibits its own scaling relation. Uchide and Imanishi (2016) reported similar differences  
297 from the omega-square model would be valid also for smaller earthquakes by using spectral  
298 ratio technique that involves empirical Green's function (EGF) events to avoid having a  
299 complete knowledge of path and site effects for shallow target earthquakes ( $M_w$  3.2–4.0) in  
300 Japan. The source spectra for many of the target events in their study suggested a remarkable  
301 discrepancy from the omega-square model for relatively small earthquakes. They explained  
302 such differences by incoherent rupture due to heterogeneities in fault properties and applied  
303 stress, the double-corner-frequency model, and possibility of a high-frequency falloff  
304 exponent value slightly higher than 2. In our case, the smallest event was with  $M_w$ -coda  
305 larger than 2.0, thus we had no chance to make a similar ~~comparison~~ compared to that of  
306 Eulenfeld and Wegler (2016).; However, high-frequency fall-off parameters varied from  
307  $n=0.5$  to  $n=4$ . A notable observation in the distribution of  $n$  was  $n=2$  or  $n=2.5$  would be better  
308 explained for earthquakes with  $M_w$ -coda  $>4.0$  whereas the smaller magnitudes exhibited more  
309 scattered pattern of variation in  $n$  (Figure 7). Eulenfeld and Wegler (2016) claimed that the  
310 use of separate estimates of the attenuation or correction for path effect via empirically  
311 determined Green's function would be better strategy in order to invert station displacement  
312 spectra for source parameters. This is mainly because smaller earthquakes (with  $n>2$ ), in  
313 particular, assuming omega-square model can distort the estimates of corner frequency and



314 even seismic moment especially in regions where Q is strongly frequency dependent. Thus,  
315 independent estimates of Q during station displacement spectra inversions for source  
316 parameters must be taken into account or the influence of path such as attenuation must be  
317 removed via empirically determined Green's functions (Eulenfeld and Wegler, 2016).

318

### 319 *5.2 Coda wave –derived magnitude vs. $M_L$ catalogue magnitude*

320 A scatter plot between catalogue magnitudes based on local magnitudes ( $M_L$ ) and our coda-  
321 derived magnitudes ( $M_W$ -coda) that are inferred from resultant frequency dependent source  
322 displacement spectra and thus seismic moment (e.g. Eq. 9) is shown in Fig. 6. Such  
323 comparison suggests an overall coherency between both types of magnitudes. This implies  
324 that a very simple model of a first-order approximation for S-wave scattering with isotropic  
325 acoustic radiative transfer approach can be efficient to link the amplitude and decaying  
326 character of coda wave envelopes to the seismic moment of the source.

327

328 In the present study, a linear regression analyses performed between  $M_W$ -coda and  $M_L$   
329 magnitudes (Fig. 5) resulted in an empirical formula that can be employed to convert local  
330 magnitudes into coda-derived moment magnitude calculation of local earthquakes in this  
331 region:

332

$$333 \quad M_{W-coda} = 1.1655 \pm 0.0337 \times M_L - 0.7085 \pm 0.0128 \quad (10)$$

334

335 Bakun and Lindh (1977) empirically described the linear log seismic moment-local  
336 magnitude relation between seismic moments ( $M_0$ ) and local magnitudes ( $M_L$ ) for  
337 earthquakes near Oroville, California. Beside this several other studies investigated to find an  
338 optimum relation between  $M_W$  and  $M_L$  by implementing linear and/or non-linear curve-fitting

339 approaches. Malagnini and Munafò (2018) proposed two different linear fits separated by a  
340 crossover  $M_L=4.31$  could represent  $M_L$ - $M_W$  data points obtained from earthquakes of the  
341 central and northern Apennines, Italy. Several coefficient of regression analyses in their fits  
342 account for the combined effects of source scaling and crustal attenuation as well as regional  
343 attenuation, focal depth, and rigidity at source. Goertz-Allmann et al. (2011), for instance,  
344 introduced hybrid type of scaling relation that is linear below  $M_L$  2 and above  $M_L$  4 and a  
345 quadratic relation in between ( $2 \leq M_L \leq 4$ ) for earthquakes in Switzerland detected between  
346 1998 and 2009. Edwards and Rietbrock (2009) employed a second-order polynomial equation  
347 to relate local magnitudes routinely reported in the Japan Meteorological Agency (JMA)  
348 magnitude and moment magnitude. More recently, using multiple spectral ratio analyses  
349 Uchide and Imanishi (2018) estimated relative moment magnitudes for the Fukushima  
350 Hamadori and the northern Ibaraki prefecture areas of Japan and reported a quadratic form of  
351 correlation between JMA magnitudes and moment magnitudes. Resultant empirical curve in  
352 Uchide and Imanishi (2018) implied a considerable discrepancy between the moment  
353 magnitudes and the JMA magnitudes, with a slope of 1/2 for microearthquakes suggesting  
354 possible biases introduced by anelastic attenuation and the recording by a finite sampling  
355 interval.

356

357 Apparent move-out in Fig. 5 and Eq. 10, presumably stems from the use of different  
358 magnitude scales for comparison. Conventional magnitudes scales such as  $M_L$ , mb inferred  
359 from phase amplitude measurements are seemingly sensitive to attenuation and 2D variation  
360 along the path (Pasyanos et al., 2016). Unlike local magnitude scales, seismic moment-based  
361 moment magnitude ( $M_W$ ) essentially represents a direct measure of the strength of an  
362 earthquake caused by fault slip and is estimated from relatively flat portion of source spectra  
363 at lower frequencies that can be less sensitive to the near surface attenuation effects. The

364 consistency between coda-derived moment magnitude and local magnitude scales for the  
365 earthquakes with  $M_{W-coda} > 3.0$  indicates that our non-empirical approach successfully  
366 worked in this tectonically complex region. This observation is anticipated, for relatively  
367 large earthquakes, since more energy will be characteristic at lower frequencies. We  
368 observed similar type of consistency in early studies that investigate source properties of local  
369 and regional earthquakes based on empirical coda methods with simple 1-D radially  
370 symmetric path correction (e.g. Eken et al., 2004; Gök et al., 2016). Coda waves-derived  
371 source parameters were obtained with high-precision in Mayeda et al. (2005), Phillips et al.  
372 (2014), Pasyanos et al. (2016) following the use of 2-D path-corrected station techniques to  
373 consider the amplitude-distance relationships. Observable outliers in Figure 5, for the events  
374 with less than  $M_w$  3.5, however, can be attributed to the either possible biases on local  
375 magnitude values taken from the catalogue or small biases on our intrinsic ( $Q_i^{-1}$ ) and  
376 scattering ( $Q_s^{-1}$ ) attenuation terms. One another possible contribution to such mismatch might  
377 be associated to the influences of mode conversions between body and surface waves or  
378 surface-to-surface wave scattering (~~e.g. Wu & Aki 1985~~) that are not restricted to low  
379 frequencies (<1Hz) (Sens-Schönfelder and Wegler, 2006).

380

## 381 *6. Conclusions*

382 This study provides moment magnitude estimates as a direct physical measure of the seismic  
383 energy for local earthquakes with magnitudes  $2.0 \leq M_L \leq 5.2$  recorded at ~~72~~ 69 seismic  
384 stations in central Anatolia. The source displacement spectra were obtained following the  
385 application of a coda wave modeling procedure that employs a simultaneous optimization of  
386 source, path, and site specific terms by fitting physically derived synthetic coda envelope and  
387 observed coda envelopes. The Radiative Transfer Theory was used for analytic expression of  
388 synthetic coda wave envelopes. Overall consistency between  $M_w$ -coda and  $M_L$  suggests that

389 our non-empirical approach successfully worked in this tectonically complex region.  
390 Variation of high-frequency fall-off parameter indicated that for smaller earthquakes ( $n > 2$ )  
391 assuming omega-square model can distort the estimates of corner frequency and even seismic  
392 moment especially in regions where  $Q$  is strongly frequency dependent. Since the present  
393 study mainly focuses on source properties of local earthquakes in the study area, scattering  
394 and intrinsic attenuation properties that are other products of our coda envelope fitting  
395 procedure will be examined in details within a future work. Finally, a linear regression  
396 analyses resulted in an empirical relation developed between  $M_w$ -coda and  $M_L$ , which will be  
397 a useful tool in the future to quickly convert catalogue magnitudes into moment magnitudes  
398 for local earthquakes in the study area.

399

400 ~~This study provides an independent solution for estimating seismic source parameters such as~~  
401 ~~seismic moment and moment magnitude for local earthquakes in central Anatolia without~~  
402 ~~requiring *a priori* information on reference events with waveform modelling results to be~~  
403 ~~used for calibration or *a priori* information on attenuation for path effect corrections. In this~~  
404 ~~regard, the approach used here can be easy and useful tool for investigation of source~~  
405 ~~properties of local events detected at temporal seismic networks. Moreover, seismic moment~~  
406 ~~can be approximated via waveform modelling methods but due to the small scale~~  
407 ~~heterogeneities of the media that waves propagate, it is often a hard task to establish Green's~~  
408 ~~function for small earthquakes ( $M_L < 3.5$ ). An analytical expression of energy density Green's~~  
409 ~~function in a statistical manner employed in the present work enables neglecting the~~  
410 ~~interaction of the small scale inhomogeneities with seismic waves as this can be practical for~~  
411 ~~seismic moment calculations of small events that may pose source energy at high frequency.~~  
412 ~~It is noteworthy to mention that our isotropic scattering assumption does not consider~~  
413 ~~anisotropic case, which could be valid for real media, but still provides a simple and effective~~

414 ~~tool to define the transport for the anisotropic case since the estimated scattering coefficient~~  
415 ~~can be interpreted as transport scattering coefficient. An averaging over S-wave window~~  
416 ~~enables to overcome biases caused by using unrealistic Green's function (Gaebler *et al.*~~  
417 ~~2015). Since the present study mainly focuses on source properties of local earthquakes in the~~  
418 ~~study area, scattering and intrinsic attenuation properties that are other products of our coda~~  
419 ~~envelope fitting procedure will be examined in details within a future work. Finally, the~~  
420 ~~empirical relation developed between  $M_w$ -coda and  $M_L$  will be a useful tool for quickly~~  
421 ~~converting catalogue magnitudes to moment magnitudes for local earthquakes in the study~~  
422 ~~area.~~

423

#### 424 *Data and resources*

425 The python code used for carrying out the inverse modeling is available under the permissive  
426 MIT license and is distributed at <https://github.com/trichter/qopen>. We are grateful to the IRIS  
427 Data Management Center for maintaining, archiving and making the continuous broadband  
428 data used in this study open to the international scientific community. ~~The KOERI is specially~~  
429 ~~thanked for providing publicly open local seismicity catalogues.~~

430

#### 431 *Acknowledgement*

432 The facilities of IRIS Data Services, and specifically the IRIS Data Management Center, were  
433 used for access to waveforms, related metadata, and/or derived products used in this study.  
434 IRIS Data Services are funded through the Seismological Facilities for the Advancement of  
435 Geoscience and EarthScope (SAGE) Proposal of the National Science Foundation under  
436 Cooperative Agreement EAR-1261681. Data for the CD-CAT experiment  
437 ([https://doi.org/10.7914/SN/YB\\_2013](https://doi.org/10.7914/SN/YB_2013)) are available from the IRIS Data Management Center  
438 at <http://www.iris.edu/hq/>. Tuna Eken acknowledge financial support from Alexander von

439 Humboldt Foundation (AvH) towards computational and peripherals resources. I am grateful  
440 to the Topical Editor Charlotte Krawczyk for handling the revision process and Takahiko  
441 Uchide and Ludovic Margerin for their valuable opinions on the improvement of manuscript.

442 *References*

443 Abercrombie, R.E.: Earthquake source scaling relationships from  $-1$  to 5 ML using  
444 seismograms recorded at 2.5-km depth, *J. geophys. Res.*, 100(B12), 24 015–24 036,  
445 1995.

446 Aki, K., and Chouet., B.: Origin of coda waves: Source, attenuation, and scattering effects, *J.*  
447 *Geophys. Res.* 80, 3322–3342, 1975.

448 Atkinson, G. M.: A comparison of eastern North American ground motion observations with  
449 theoretical predictions, *Seismol. Res. Lett.* 61, 171–180, 1990.

450 Bakun, W.H. and Lindh, A.G.: Local Magnitudes, Seismic Moments, and Coda Durations for  
451 Earthquakes Near Oroville, California, *Bulletin of the*  
452 *Seismological Society of America*. Vol.67, No.3, pp. 615-629, 1977.

453 Bozkurt, E.: Neotectonics of Turkey—A synthesis: *Geodinamica Acta*, v. 14, p. 3–30, 2001.

454 Bulut, F., Bohnhoff, M., Eken, T., Janssen, C., Kılıç, T., and Dresen, G.: The East Anatolian  
455 fault zone: Seismotectonic setting and spatiotemporal characteristics of seismicity based  
456 on precise earthquake locations: *Journal of Geophysical Research*, v. 117, B07304,  
457 <https://doi.org/10.1029/2011JB008966>, 2012.

458 Çemen, I., Göncüoğlu, M.C., and Dirik, K.: Structural evolution of the Tuz Gölü basin in central  
459 Anatolia, Turkey: *Journal of Geology*, v. 107, p. 693–706, <https://doi.org/10.1086/314379>, 1999.

461 Çubuk Y, Yolsal-Çevikbilen S, Taymaz, T.: Source parameters of the 20052008 Bal<sup>^</sup>aSirapinar  
462 (central Turkey) earthquakes: Implications for the internal deformation of the Anatolian  
463 plate. *Tectonophysics* 635(Supplement C) :125 – 153, 2014.

464 Denolle, M. A., and Shearer, P.M.: New perspectives on self-similarity for shallow thrust  
465 earthquakes, *J. Geophys. Res. Solid Earth*, 121, 6533–6565, 2016.

466 Edwards, B., & Rietbrock, A.: A comparative study on attenuation and source-scaling relations  
467 in the Kantō, Tokai, and Chubu regions of Japan, using data from Hi-net and KiK-net.  
468 *Bulletin of the Seismological Society of America*, 99, 2435–2460, 2009.

469 Eken, T., Mayeda, K., Hofstetter, A., Gök, R., Orgülü, G. and Turkelli, N.: An application of the  
470 coda methodology for moment-rate spectra using broadband stations in Turkey.  
471 *Geophys. Res. Lett.*, 31, L11609, 2004.

472 Eulenfeld, T. and Wegler, U.: Measurement of intrinsic and scattering attenuation of shear  
473 waves in two sedimentary basins and comparison to crystalline sites in Germany,  
474 *Geophys J Int.*, 205(2):744-757, 2016.

475 Eulenfeld, T. and Wegler, U.: Crustal intrinsic and scattering attenuation of high-frequency  
476 shear waves in the contiguous United States. *J Geophys., Res*, 122, 2017.

477 Favreau, P., and Archuleta, R.J.: Direct seismic energy modelling and application to the 1979  
478 Imperial Valley earthquake, *Geophys. Res. Lett.*, 30, 1198, 2003.

479 Gaebler, P.J., Eulenfeld, T. & Wegler, U.: Seismic scattering and absorption parameters in the  
480 W-Bohemia/Vogtland region from elastic and acoustic radiative transfer theory,  
481 *Geophys. J. Int.*, 203(3), 1471–1481, 2015.

482 Gaebler, P.J., Eken, T., Bektaş, H.Ö, Eulenfeld, T., Wegler, U., Taymaz, T.: Imaging of Shear  
483 Wave Attenuation Along the Central Part of the North Anatolian Fault Zone, Turkey,  
484 submitted to the *Journal of Seismology*, 2018.

485 Goertz-Allmann, B. P., Edwards, B., Bethmann, F., Deichmann, N., Clinton, J., Fäh, D., &  
486 Giardini, D.: A new empirical magnitude scaling relation for Switzerland. *Bulletin of the*  
487 *Seismological Society of America*, 101, 3088–3095, 2011.

488 Gök, R., Kaviani, A., Matzel, E. M., Pasyanos, M. E., Mayeda, K., Yetirmishli, G., El-Hussain,  
489 I., Al-Amri, A., Al-Jeri, F., Godoladze, T., Kalafat, D., Sandvol, E. A., and Walter,  
490 W.R.: Moment Magnitudes of Local/Regional Events from 1D Coda Calibrations in the  
491 Broader Middle East Region. *Bull Seismol Soc Am.*, 106(5):1926-1938, 2016.

492 Gusev, A.A. & Abubakirov, I.R.: Simulated envelopes of non-isotropically scattered body  
493 waves as compared to observed ones: another manifestation of fractal heterogeneity,  
494 *Geophys. J. Int.*, 127(1), 49–60, 1996.

495 Hanks, T.C. and Kanamori, H.: A moment magnitude scale, *J. Geophys., Res.*, 84, 2348–2350,  
496 1979.

497 Izgi, G., Eken, T., Gaebler, P., and Taymaz, T.: Frequency-Dependent Shear Wave Attenuation  
498 Along the Western Part of the North Anatolian Fault Zone, *Geophysical Research*  
499 *Abstracts*, Vol. 20, EGU2018-629-2, 2018.

500 Kaymakci, N. Inceöz, M. Ertepinar, P.: 3D architecture and Neogene evolution of the Malatya  
501 Basin: inferences for the kinematics of the Malatya and Ovacik Fault Zones. *Turkish*  
502 *Journal of Earth Sciences*, 15, 123-154, 2006.

503 Kwiatek, G., Plenkers, K. & Dresen, G.: 2011. Source parameters of pico-seismicity recorded at  
504 Mponeng Deep Gold Mine, South Africa: implications for scaling relations, *Bull. seism.*  
505 *Soc. Am.*, 101(6), 2592–2608, 2011.

506 Malagnini, L., Mayeda, K., Akinci, A., and Bragato, P. L.: Estimating absolute site effects,  
507 *Bull. Seismol. Soc. Am.* 94, no. 4, 1343–1352, 2004.

508 Malagnini, L., and Munafò, I.: On the Relationship between  $M_L$  and  $M_w$  in a Broad Range: An  
509 Example from the Apennines, Italy, *Bulletin of the Seismological Society of America*,  
510 Vol. 108, No. 2, pp. 1018–1024, 2018.



511 Mayeda, K., and Walter, W.R.: Moment, energy, stress drop, and source spectra of western  
512 United States earthquakes from regional coda envelopes, *J. Geophys. Res.* 101, 11,195–  
513 11,208, 1996.

514 Mayeda, K., Hofstetter, A., O’Boyle, J.L., and Walter, W.R.: Stable and transportable regional  
515 magnitudes based on coda-derived moment-rate spectra, *Bull. Seismol. Soc. Am.* 93,  
516 224–239: 2003.

517 Mayeda, K., Malagnini, L., Phillips, W. S., Walter, W. R., and Dreger, D.: 2D or not 2D, that is  
518 the question: A Northern California Test. *Geophysical Research Letters*, 32(12), 2005.

519 Morasca, P., Mayeda, K., Malagnini, L. and Walter, W.R.: Coda and direct-wave attenuation  
520 tomography in northern Italy, *Bull Seismol Soc Am.*, v. 98, pages, 1936-1946, 2004.

521 Morasca, P., Mayeda, K., Gök, R., Phillips, W.S., and Malagnini, L.: Coda-derived source  
522 spectra, moment magnitudes and energy-moment scaling in the western Alps, *Geophys.*  
523 *J. Int.*, 160, 263–275, 2008.

524 Paasschens, J.: Solution of the time-dependent Boltzmann equation, *Phys. Rev. E*, 56(1), 1135–  
525 1141, 1997.

526 Papageorgiou, A., and Aki, K.: A specific barrier model for the quantitative description of  
527 inhomogeneous faulting and the prediction of strong ground motion I: Description of the  
528 model, *Bull. Seismol. Soc. Am.*, 73(3), 693–722, 1983.

529 Pasyanos, M. E., R. Gök, and Walter, W.R.: 2-D variations in coda amplitudes in the Middle  
530 East. *Bull. Seismol. Soc. Am.* 106, no. 5, 2016.

531 Phillips, W. S., Mayeda, K. M., and Malagnini, L.: How to invert multi-band, regional phase  
532 amplitudes for 2-d attenuation and source parameters: Tests using the usarray. *Pure and*  
533 *Applied Geophysics*, 171(3):469-484, 2014.

534 Portner, D.E., Delph, J.R., Biryol, C.B., Beck, S.L., Zandt, G., Özacar, A.A., Sandvol, E., and  
535 Türkelli, N.: Subduction termination through progressive slab deformation across  
536 Eastern Mediterranean subduction zones from updated P-wave tomography beneath  
537 Anatolia, *Geosphere*, 14(3): 907-925, 2018.

538 Przybilla, J. and Korn, M.: Monte Carlo simulation of radiative energy transfer in continuous  
539 elastic random mediathree-component envelopes and numerical validation. *Geophys J*  
540 *Int* , 173(2):566-576, 2008.

541 Rautian, T.G. & Khalturin, V.I.: The use of the coda for determination of the earthquake source  
542 spectrum, *Bull. Seism. Soc. Am.*, 68(4), 923–948, 1978.

543 Sato, H. and Fehler, M.C.: *Seismic Wave Propagation and Scattering in the Heterogeneous*  
544 *Earth*, Springer-Verlag, New York, 1998.

545 Sato, H., Fehler, M.C. & Maeda, T. *Seismic Wave Propagation, and Scattering in the*  
546 *Heterogeneous Earth*, 2nd edn, Springer: 2012.

547 Sens-Schönfelder, C. and Wegler, U.: Radiative transfer theory for estimation of the seismic  
548 moment. *Geophys J Int*, 167(3):1363-1372.

549 Taymaz, T., Jackson, J., Westaway, R.: Earthquake mechanisms in the Hellenic Trench near  
550 Crete. *Geophys. J. Int.*102, 695–731, 1990.

551 Taymaz, T., Westaway, R., Reilinger, R.: Active faulting and crustal deformation in the eastern  
552 Mediterranean Region. *Spec. Issue Tectonophys.* 391 (1-4), 1–9. [http://](http://dx.doi.org/10.1016/j.tecto.2004.07.005)  
553 [dx.doi.org/10.1016/j.tecto.2004.07.005](http://dx.doi.org/10.1016/j.tecto.2004.07.005), 2004.

554 Tchalenko, J. S.: *Similarities between shear zones of different magnitudes. Geol. Soc. Am.*  
555 *Bull.*, 81, 1625–1640, 1970.

556 Uchide, T., & Imanishi, K.: Small earthquakes deviate from the omega-square model as revealed  
557 by multiple spectral ratio analysis. *Bulletin of the Seismological Society of America*,  
558 106(3), 1357–1363, 2016.

559 Uchide, T., & Imanishi, K.: Underestimation of microearthquake size by the magnitude scale of  
560 the Japan Meteorological Agency: Influence on earthquake statistics. *Journal of*  
561 *Geophysical Research: Solid Earth*, 123, 606–620, 2018.

562 Yoo, S.-H., Rhie, J., Choi, H.-S., and Mayeda, K.: Coda-derived source parameters of  
563 earthquakes and their scaling relationships in the Korean Peninsula, *Bull. Seismol. Soc.*  
564 *Am.*, 101, 2388–2398, 2011.

565 ~~Wu, R. and Aki, K.: The fractal nature of the inhomogeneities in the lithosphere evidenced from~~  
566 ~~seismic wave scattering, *Pure appl. Geophys.*, 123(6), 805–818, 1985.~~

567 Zeng, Y., Su, F. and Aki, K.: Scattering wave energy propagation in a random isotropic  
568 scattering medium: 1. Theory, *J. Geophys. Res.*, 96(B1), 607–619, 1991.

569

#### 570 *Figure Captions*

571 Figure 1. Major tectonic features of Turkey and its adjacent. The plate boundary data used  
572 here is taken from Bird (2003). Subduction zones are black, continental transform faults are  
573 red, continental rift boundaries are green, and spreading ridges boundaries are yellow. NAFZ,  
574 EAFZ, and DSFZ are the North Anatolian Fault, East Anatolian Fault, and the Dead Sea fault,  
575 respectively.

576

577 Figure 2. Epicentral distribution of all local events selected from the study area in the KOERI  
578 catalogue. Gray circles represent earthquakes with poor quality that are not considered for the  
579 current study while black indicates the location of local events with good quality. Red circles  
580 among these events are 487 events used in coda wave inversion since they are successful at  
581 passing quality criteria of further pre-processing procedure.

582

583 Figure 3. An example from the inversion procedure explained in chapter 3. Here coda  
584 envelope fitting optimization is performed on band-pass filtered (4-8Hz-16Hz) digital  
585 recordings of an earthquake (2014 April 09,  $M_w$ -coda3.2) extracted for 7 seismic stations that  
586 operated within the CD-CAT array. Large panel at the lower left-hand side displays the error  
587 function  $\varepsilon$  as a function of  $g_0$ . Thick blue cross here represent the optimal value of  $g = g_0$ .  
588 Other small panels at upper and right-hand side show the least- squares solution of the  
589 weighted linear equation system for the first 6 guesses and optimal guess for  $g_0$ . ~~There~~ The  
590 dots and gray curves indicate the ratio between energy ( $E^{obs}$ ) and the Green's function ( $G$ )  
591 obtained for direct S-waves and observed envelopes at various stations, respectively (Please  
592 notice that during this optimization process envelopes are corrected for the obtained site  
593 corrections  $R_i$ ). The slope of linear curve at each small panel yields  $-b$  in relation to the  
594 ~~intrinsic attenuation. The linear curve~~ has an intercept of  $W$  representing source related terms  
595 at the right-hand side of equation 5 ~~part of the right-hand side of the equation system.~~

596

597 Figure 4. a) Results of the inversion of the 2014-April-09,  $M_w$ -coda3.2 earthquake: Sample  
598 fits between observed and calculated energy densities in the frequency band 0.5–1.0 Hz are  
599 given for 6 different stations (see upper right corner for event ID, station name, and distance  
600 to hypocenter). Note that light blue curves represent observed envelope. Smoothed observed  
601 calculated envelopes in each panel are presented by blue and red curves, respectively. Blue  
602 and red dots exhibit location of the average value for observed and calculated envelopes  
603 within the S-wave window, respectively. b) The same as in (a) obtained in the frequency band  
604 4.0–8.0 Hz.

605

606 Figure 5. All individual observed (black squares) and predicted (gray curve) source  
607 displacement spectra observed at 72 stations from 487 local earthquakes in central Anatolia.

608

609 Figure 6: Scatter plot between local magnitudes ( $M_L$ ) of analyzed events with coda waves-  
610 derived magnitudes ( $M_W$ -coda) of the same events. The outcome of a linear regression  
611 analysis yielded an empirical formula (e.g. Eq. 10) to identify the overall agreement  
612 represented by gray straight line. Yellow and red dashed lines indicate upper and lower limit  
613 of linearly fitting to that scatter.

614

615 Figure 7: Same scatter plot displayed in Fig. 6. Here color coded ~~d~~ indicates ~~by~~ estimated high-  
616 frequency fall-off parameter for each inverted event.

617

618

619

620

621

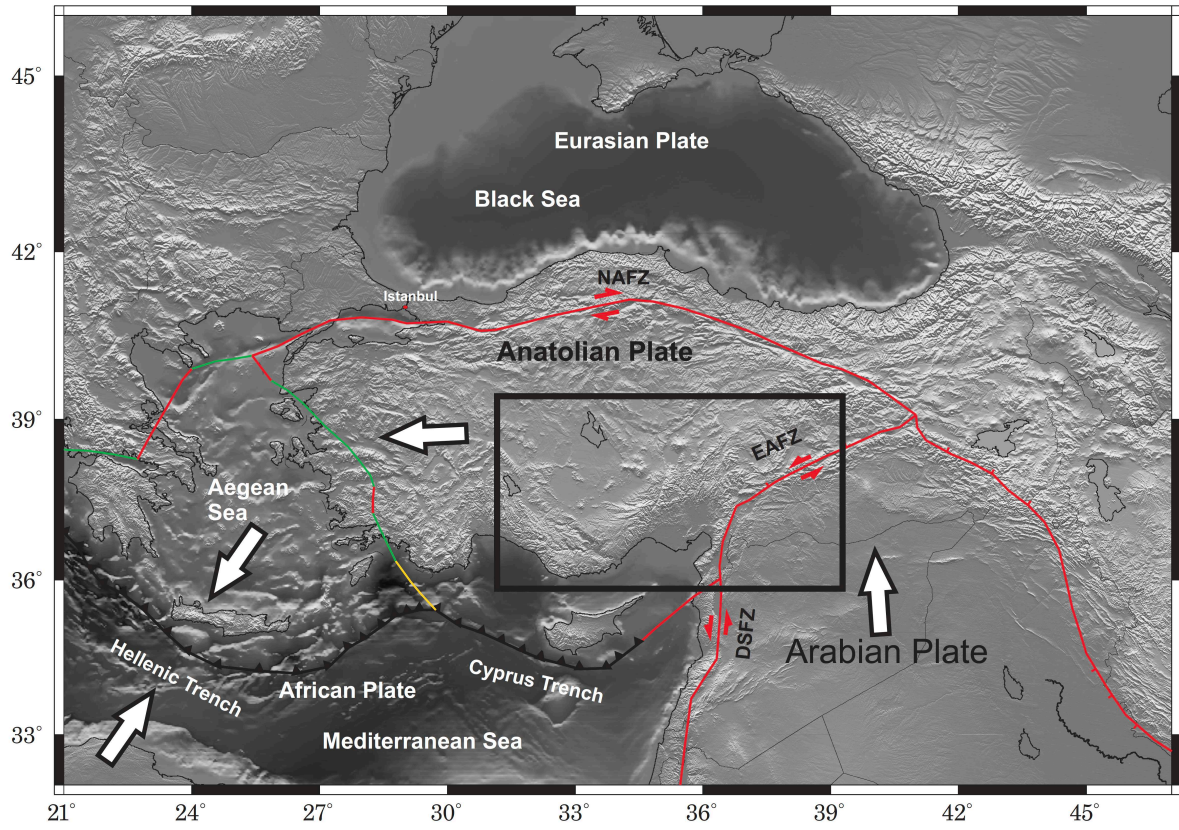

622

623

624

625 Figure 1.

626

627

628

629

630

631

632

633

634

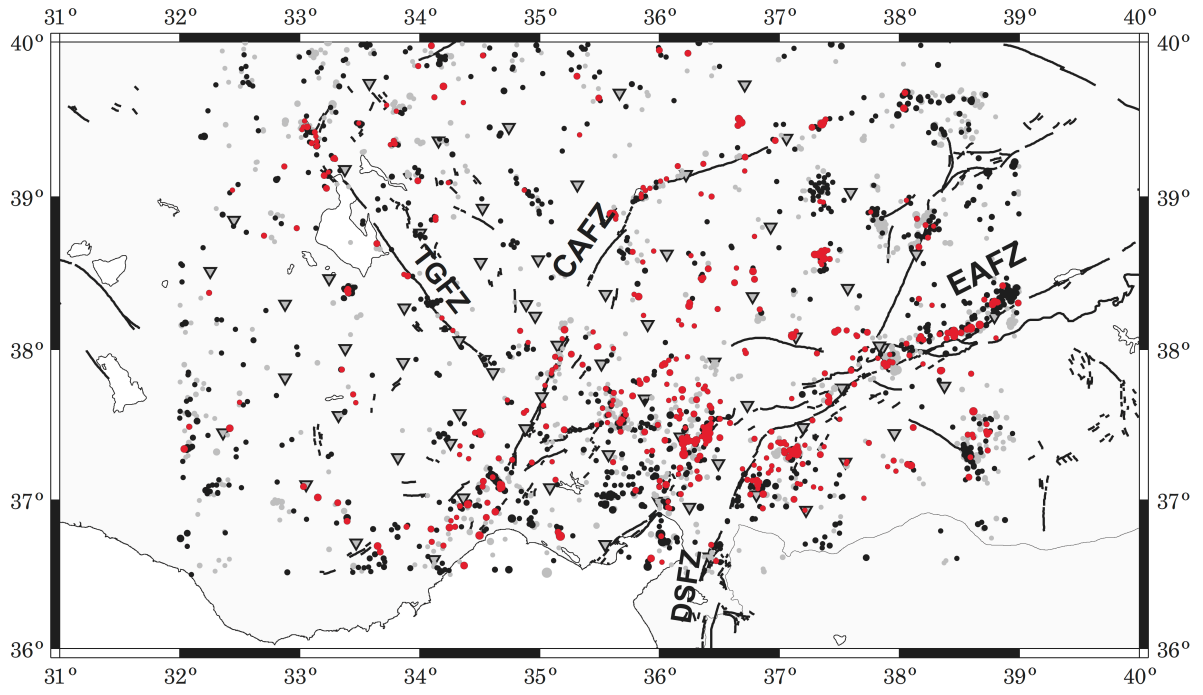

635

636 Figure 2.

637

638

639

640

641

642

643

644

645

646

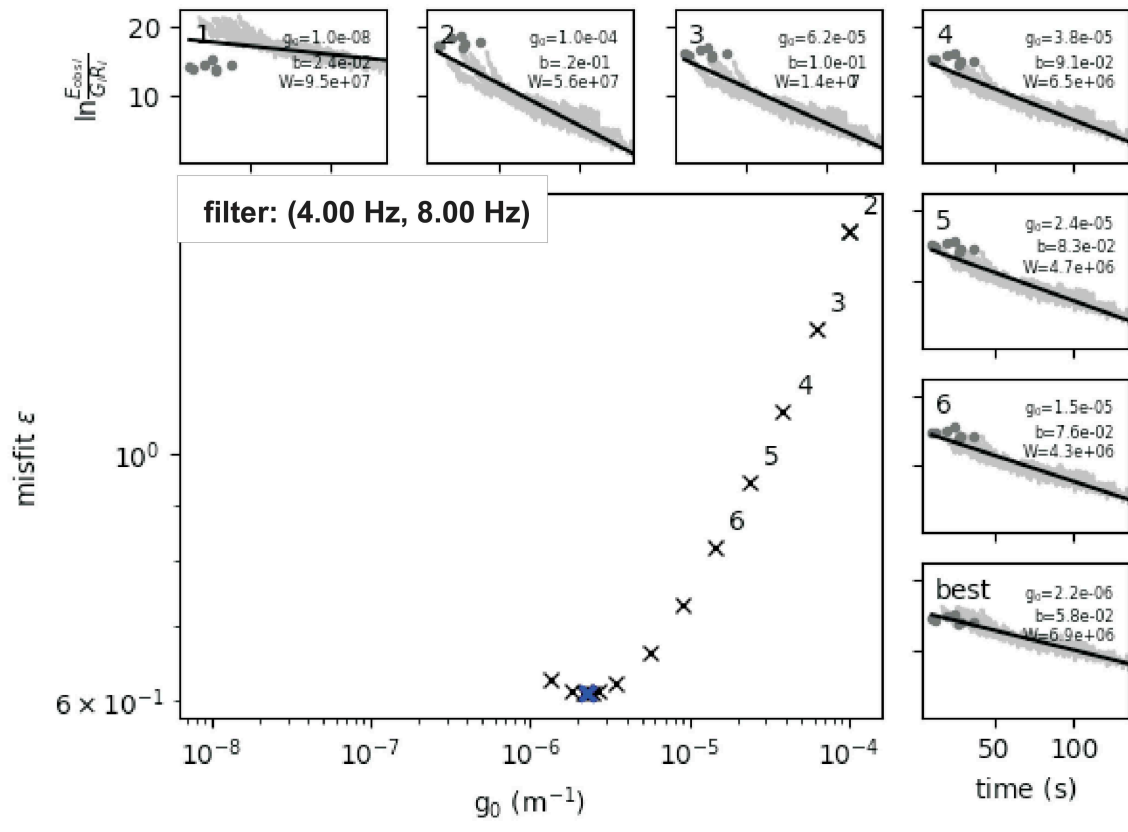

647  
 648  
 649  
 650  
 651

Figure 3.



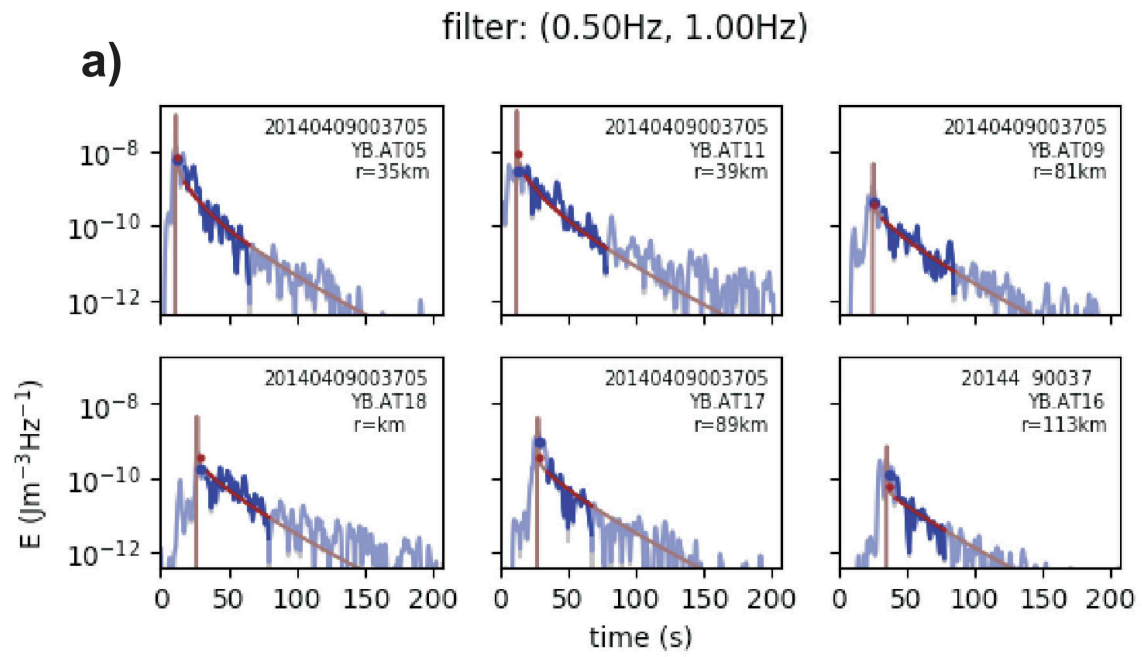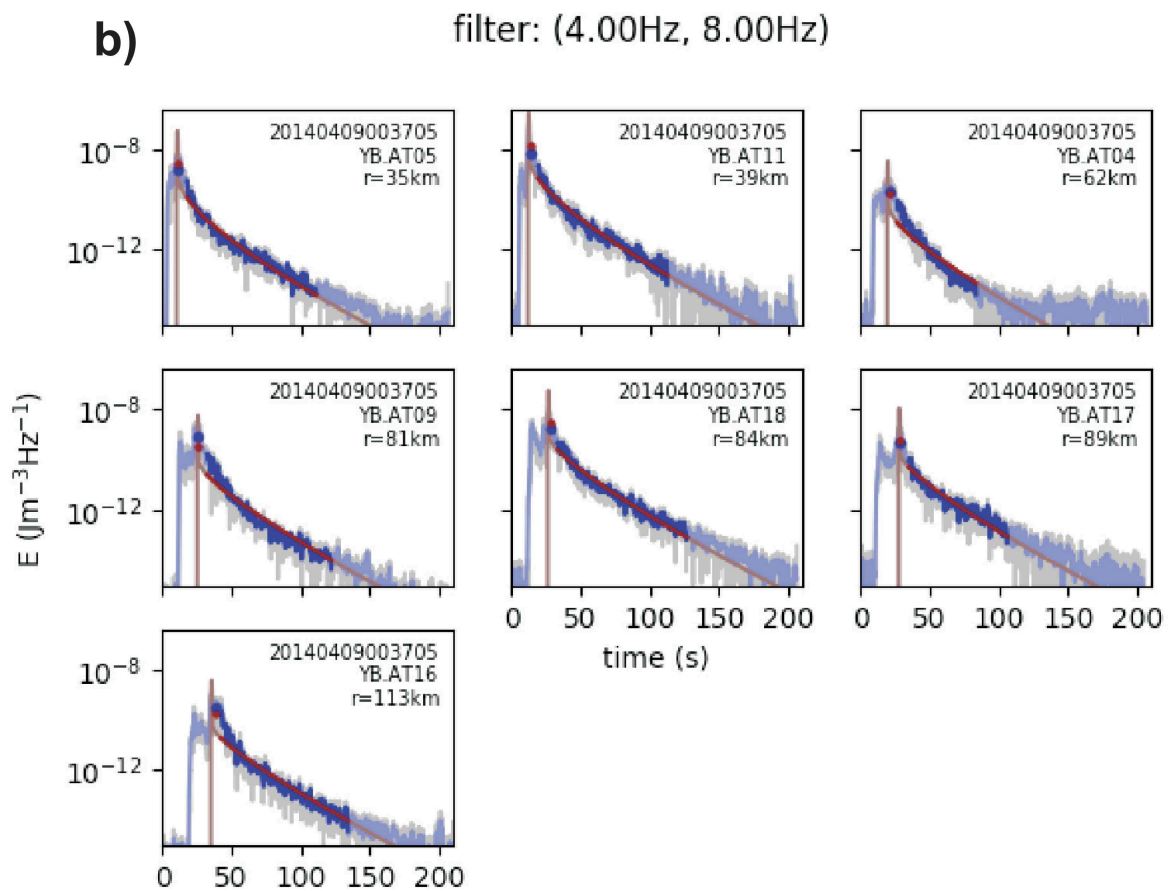

652

653

654

655

656

657

658

Figure 4.

659  
660  
661  
662  
663

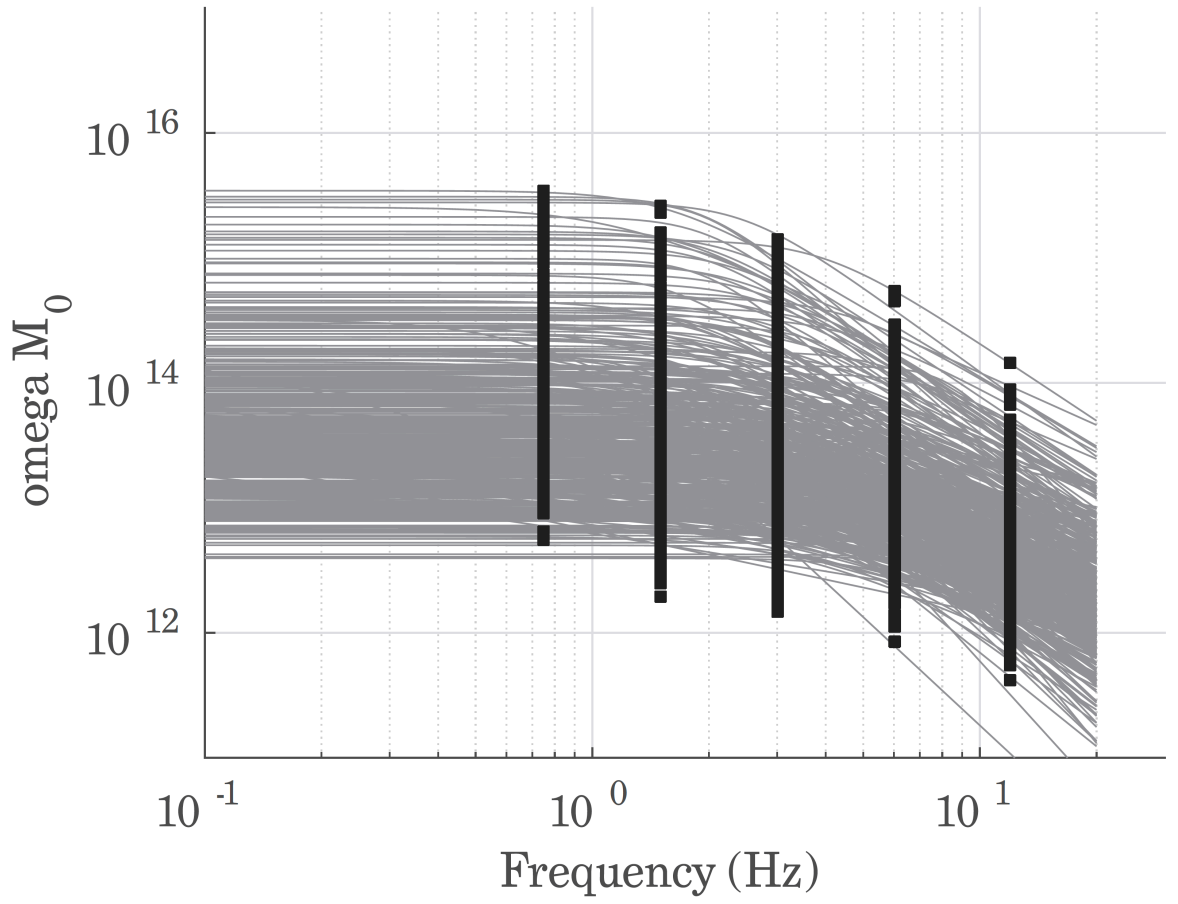

Figure 5.

664  
665  
666  
667  
668  
669  
670  
671  
672  
673  
674  
675  
676  
677  
678  
679  
680  
681  
682  
683  
684

685  
686  
687  
688  
689  
690

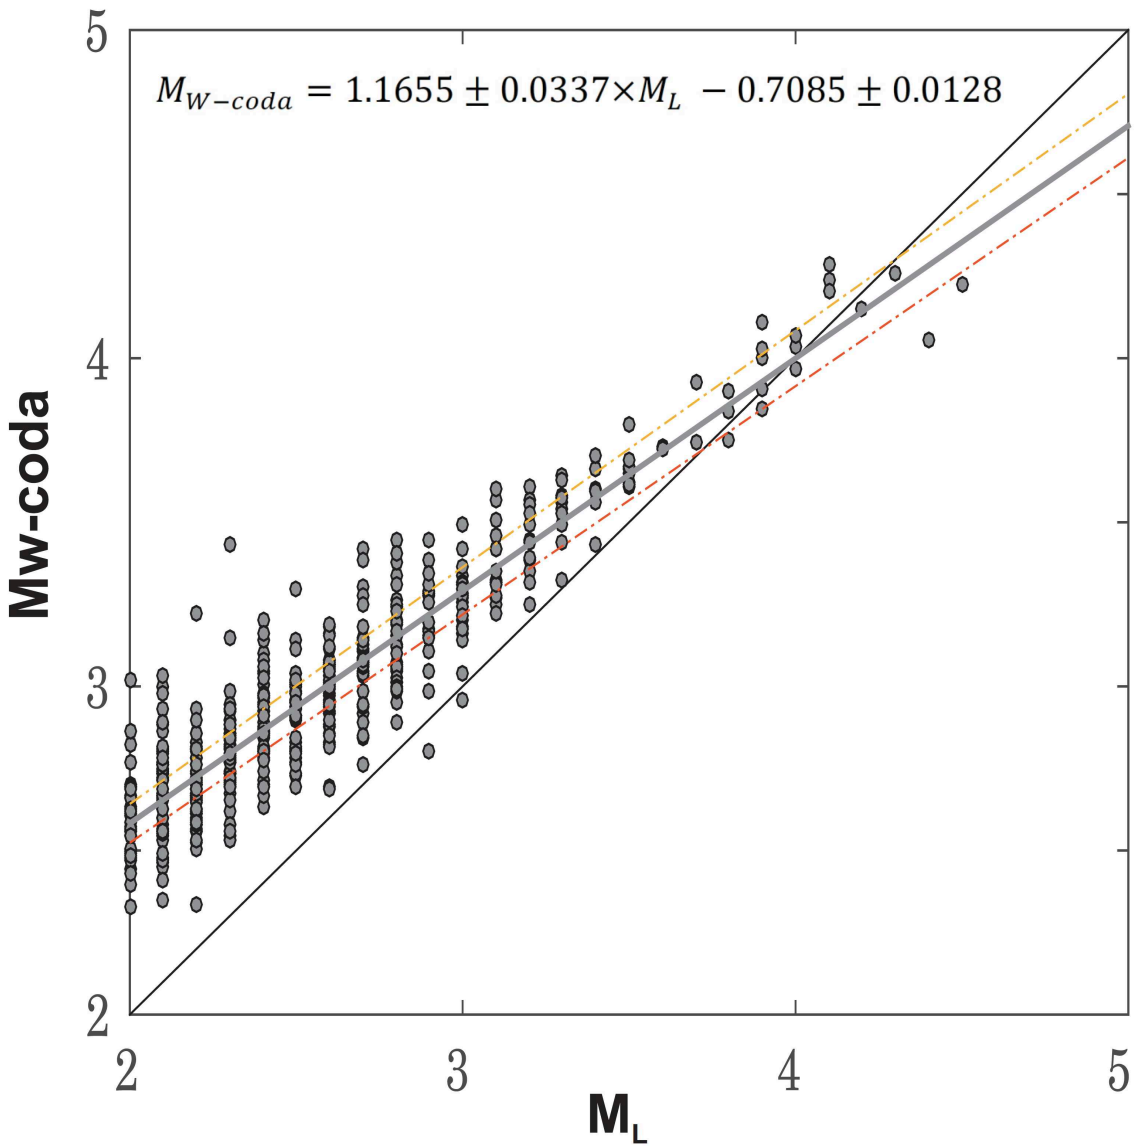

Figure 6.

691  
692  
693  
694  
695  
696  
697  
698  
699  
700  
701  
702  
703  
704

705  
706

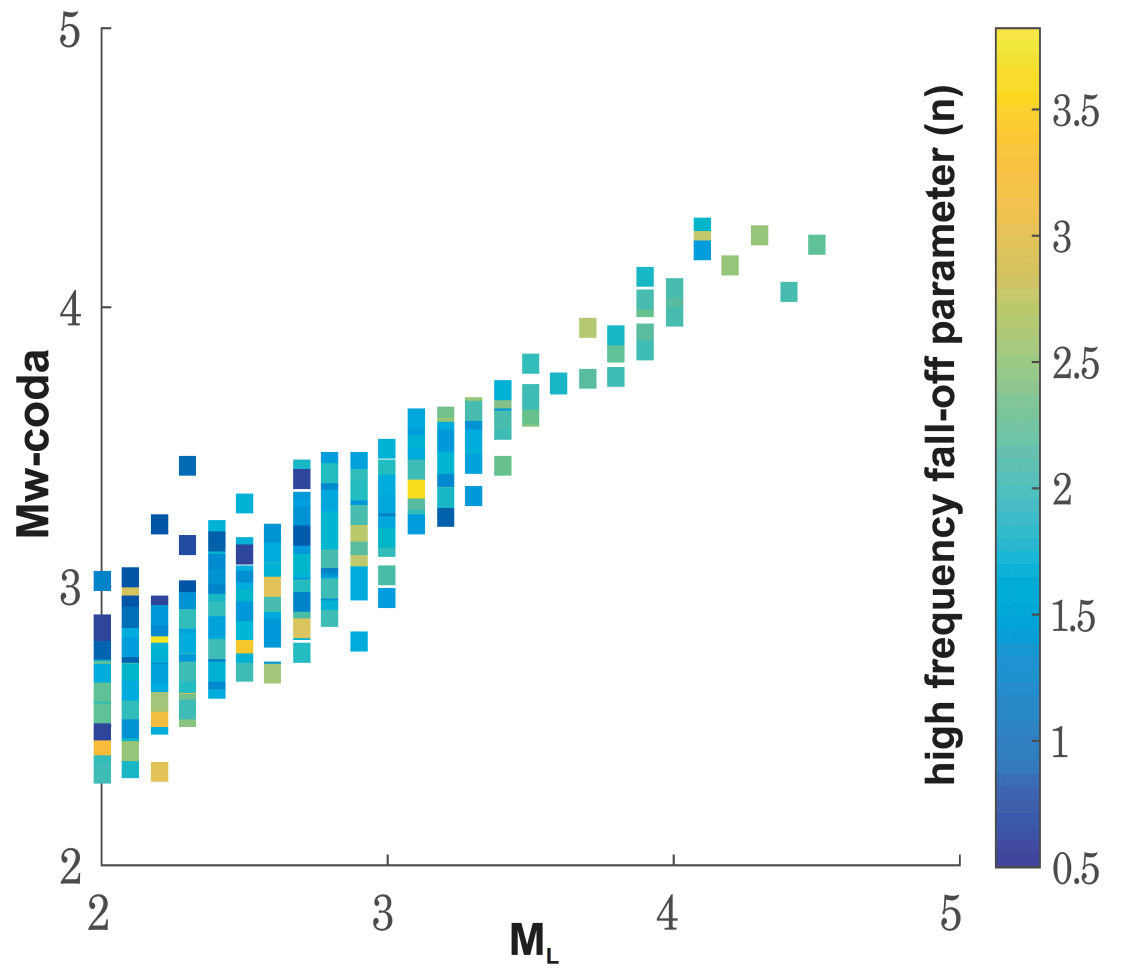

707  
708  
709  
710

Figure 7.

# 1 **Moment magnitude estimates for Central Anatolian earthquakes using coda waves**

2 Tuna Eken<sup>1</sup>

3

4 <sup>1</sup>*Department of Geophysical Engineering, the Faculty of Mines, Istanbul Technical*

5 *University, 34469 Maslak, Sariyer, Istanbul, Turkey*

6

7 *Abstract*

8 Proper estimate of moment magnitude that is a physical measure of the energy released at  
9 earthquake source is essential for better seismic hazard assessments in tectonically active  
10 regions. Here a coda wave modeling approach that enables the source displacement spectrum  
11 modeling of examined event was used to estimate moment magnitude of central Anatolia  
12 earthquakes. To achieve this aim, three component waveforms of local earthquakes with  
13 magnitudes  $2.0 \leq M_L \leq 5.2$  recorded at 69 seismic stations which have been operated  
14 between 2013 and 2015 within the framework of the CD-CAT passive seismic experiment  
15 were utilized. An inversion on the coda wave traces of each selected single event in our  
16 database was performed in five different frequency bands between 0.75 and 12 Hz. Our  
17 resultant moment magnitudes ( $M_W$ -coda) exhibit a good agreement with routinely reported  
18 local magnitude ( $M_L$ ) estimates for the study area. Apparent move-out that is, particularly,  
19 significant around the scattered variation of  $M_L$ - $M_W$ -coda data points for small earthquakes  
20 ( $M_L < 3.5$ ) can be explained by possible biases of wrong assumptions to account for anelastic  
21 attenuation and of seismic recordings with finite sampling interval. Finally, we present an  
22 empirical relation between  $M_W$ -coda and  $M_L$  for central Anatolian earthquakes.

23

24 Keyword(s): Coda waves modelling, seismic moment, moment magnitude, Radiative Transfer

25 Theory

26        1. *Introduction*

27        The robust and stable knowledge of source properties (e.g. moment magnitude estimates) is  
28        crucial in seismically active countries such as Turkey for a better evaluation of seismic hazard  
29        potential as this highly depends on establishment of reliable seismicity catalogs. Moreover,  
30        accurate information on source parameters could be important when developing regional  
31        attenuation properties.

32

33        Conventional type of magnitude scales ( $M_L$ ,  $m_b$ ,  $M_S$ ) as the result of empirically derived using  
34        direct wave analyses can be biased due to various effects such as source radiation pattern,  
35        directivity, and heterogeneities along the path since they may cause drastic changes in direct  
36        wave amplitude measurements (e.g., Favreau and Archuleta, 2003). Instead several early  
37        studies depending on the analysis of local and/or regional coda envelopes have indicated that  
38        coda wave amplitudes are significantly less variable by a factor of 3-to-5 compared to direct  
39        wave amplitudes (e.g., Mayeda and Walter, 1996; Mayeda et al., 2003; Eken et al., 2004;  
40        Malagnini et al., 2004; Gök et al., 2016). In fact local or regional coda waves that are usually  
41        considered to be generally composed of scattered waves. These wave trains can be simply  
42        explained by the single scattering model of Aki (1969) which have been proven to be  
43        virtually insensitive to any source radiation pattern effect in contrast to direct waves due to  
44        the volume averaging property of the coda waves sampling the entire focal sphere (e.g., Aki  
45        and Chouet, 1975; Rautian and Khalturin, 1978). In Sato and Fehler (1998) and Sato et al.  
46        (2012) an extensive review study on the theoretical background of coda generation and  
47        advances of empirical observations and modelling efforts can be found in details.

48

49        There have been several approaches used for extracting information on earthquake source size  
50        via coda wave analyses. These approaches can be mainly divided into two groups. The first

51 group of studies can be considered as the parametric approach and essentially employs coda  
52 normalization strategy in which measurements require a correction for empirically derived  
53 quality factors representing seismic attenuation parameters (e.g. intrinsic and scattering). In  
54 this case, adjustment of final source properties are achieved with the help of some reference  
55 events whose seismic moments are previously estimated based on waveform inversion  
56 methods. For forward generation of synthetic coda envelopes, either single-backscattering or  
57 more advanced multiple-backscattering approximation are used. An example to this group is  
58 an empirical method originally developed by Mayeda et al. (2003) to investigate seismic  
59 source parameters such as energy, moment, and apparent stress drop in the western United  
60 States and in Middle East. They corrected observed coda envelopes for various influences, for  
61 instance, path effect, S-to-coda transfer function, site effect, and any distance-dependent  
62 changes in coda envelope shape. Empirical coda envelope method have been successfully  
63 applied to different regions with complicated tectonics such as northern Italy (e.g. Morasca et  
64 al., 2008), Turkey and Middle East (e.g. Eken et al., 2004; Gök et al. 2016); or Korean  
65 Peninsula (e.g. Yoo et al., 2013).

66  
67 Second type of approach depends on estimating source and structural properties through a  
68 joint inversion technique. This technique employs a simultaneous optimization of source,  
69 path, and site specific terms via a fitting procedure between physically derived synthetic coda  
70 envelope and observed coda envelope within a selected time window that includes both the  
71 observed coda and direct-S wave parts. Although the conventional coda-normalization  
72 method essentially relies on the correction for undesired effects of the source and site  
73 amplifications, it may fail for small events with a shorter coda. This mainly stems from  
74 random seismic noise that dominates the coda, which does not satisfy the requirement of  
75 homogeneous distribution of energy in space. In the present study, we avoid this shortcoming

76 by involving source excitation and site amplification terms in the inversion process. To  
77 achieve this, the Radiative Transfer Theory (RTT) is employed for analytic expression of  
78 synthetic coda wave envelopes. The method was originally developed by Sens-Schönfelder  
79 and Wegler (2006) and successfully tested on local and regional earthquakes ( $4 \leq M_L \leq 6$ )  
80 detected by the German Regional Seismic Network. Further it has been applied to investigate  
81 source and frequency dependent attenuation properties of different geological settings, i.e.,  
82 Upper Rhine Graben and Molasse Basin regions in Germany and western Bohemia/Vogtland  
83 in Czechia (Eulenfeld and Wegler, 2016); entire United States (2017); central and western  
84 North Anatolian Fault Zone (Gaebler et al., 2018; Izgi et al., 2018). A more realistic earth  
85 model in which anisotropic scattering conditions were earlier considered by Gusev and  
86 Abubakirov (1987) yielded peak broadening effects of the direct seismic wave arrivals. This  
87 approach that examines the propagation of P-wave elastic energy and the effect of conversion  
88 between P- and S-wave energies was later used in Zeng and Aki (1991), Przybilla and Korn  
89 (2008), Gaebler et al. (2015).

90

91 In the current work I present source spectra as the output of a joint inversion of S- and coda  
92 waves parts extracted from 487 local earthquakes with magnitudes  $2.0 < M_L < 4.5$  detected in  
93 central Anatolia. The approach used here employs isotropic acoustic RTT approach for  
94 forward calculation of synthetic coda envelopes. Gaebler et al. (2015) have observed that  
95 modeling results from isotropic scattering were almost comparable with those inferred from  
96 relatively more complex elastic RTT simulations with anisotropic scattering conditions. The  
97 use of a joint inversion technique is advantageous since it is insensitive to any potential bias,  
98 which could be introduced by external information, i.e., source properties of a reference that  
99 is obtained separately from other methods for calibration. This is mainly because of the fact  
100 that we utilize an analytical expression of physical model involving source, and path related



101 parameters to describe the scattering process. Moreover the type of optimization during joint  
102 inversion enables the estimates for source parameters of relatively small sized events  
103 compared to the one used in coda-normalization methods.

104

## 105 *2. Regional Setting*

106 Present tectonic setting of Anatolia and surrounding regions have been mainly the outcome of  
107 the northward converging movements among Africa, Arab, and Eurasian plates. To the west,  
108 the subducting African plate with a slab roll-back dynamics beneath Anatolia along Hellenic  
109 Trench has led to back-arc extension in the Aegean and western Anatolia, while  
110 compressional deformation to the east around the Bitlis–Zagros suture was explained by  
111 collisional tectonics (e.g. Taymaz et al., 1990; Bozkurt, 2001) (Fig. 1). Central Anatolia is  
112 located between an extensional regime to the west due to the subduction, and a compressional  
113 regime to the east due to the collisional tectonics. There are several fault systems responsible  
114 for ongoing seismic activity in the region. The major fault zone, the Central Anatolian Fault  
115 Zone (CAFZ) (Fig. 2), which primarily represents a transtensional fault structure with a small  
116 amount of left-lateral offset during the Miocene (e.g. Koçyiğit and Beyhan, 1998), can be  
117 considered as a boundary between the carbonate nappes of the Anatolide-Tauride block and  
118 the highly deformed and metamorphosed rocks in the Kırşehir block. To the northwest of the  
119 CAFZ, Tuz Gölü Fault Zone (TGFZ) (Fig. 2), which is characterized by a right-lateral strike  
120 slip motion with a significant oblique-slip normal component, appears to be collocated with  
121 the Tuz Gölü Basin sedimentary deposits as well as the crystalline rocks within the Kırşehir  
122 Block (e.g. Çemen et al., 1999; Bozkurt et al., 2001; Taymaz et al., 2004; Çubuk et al., 2014).  
123 At the southwest tip of the study region, the EAFZ generates large seismic activity that can be  
124 identified by rather complicated seismotectonic setting: predominantly left-lateral strike-slip  
125 motion that is well correlated with the regional deformation pattern and with existing local

126 clusters of thrust and normal faulting events on NS- and EW-trending subsidiary faults,  
127 respectively (Bulut et al., 2012). Such complicated behavior explains kinematic models (e.g.  
128 Riedel shear, anti-Riedel shear models) of the shear deformation zone evolution (Tchalenko,  
129 1970). It connects to the NAFZ at the Karlıova Triple Junction (Bozkurt, 2001) and to the  
130 south splits into various segments nearby the Adana Basin (Kaymakci et al., 2006) (Fig. 2).  
131 Toward the south, the EAFZ reaches the Dead Sea Fault Zone (DSFZ) that has a key role in  
132 accommodating northward relative motions of Arabian and African Plates with respect to  
133 Eurasia.

134

### 135 3. *Data*

136 The present work utilizes three-component waveforms of local seismic activity detected at 72  
137 broadband seismic stations (Fig. 2) that have been operated for 2 years between 2013 and  
138 2015 within the framework of a temporary passive seismic experiment, the Continental  
139 Dynamics–Central Anatolian Tectonics (CD-CAT) (Portner et al., 2018). We benefit from  
140 revisited standard earthquake catalogue information that is routinely released by the Kandilli  
141 Observatory and Earthquake Research Institute (KOERI) (publicly available at  
142 <http://www.koeri.boun.edu.tr>) to extract waveform data for a total of 2231 examined events  
143 with station-event pair distance less than 120 km and focal depths less than 10 km. Most of  
144 the detected seismic activity in the study area is associated to several fault zones in the region,  
145 i.e., the EAFZ, CAFZ, DSFZ, TGFZ, etc. Here we note that the use of only local earthquakes  
146 is to exclude possible biases, which may be introduced by Moho boundary guided Sn-waves.  
147 Upper crustal earthquakes with less than 10 km focal depths are preferred in this study to  
148 exclude effect of relatively large-scale heterogeneities on coda wave trains. Additionally, we  
149 performed a visual inspection over all waveforms to ensure high-quality waveforms. Our final

150 event number reduced to 1193. Selected station and event distributions can be seen in Figure  
151 2.

152

153 Observed waveforms were prepared at 5 different frequency bands with central frequencies at  
154 0.75, 1.5, 3.0, 6.0, 12.0 Hz via a Butterworth band-pass filtering process. In the next step, we  
155 applied Hilbert transform to filtered waveform data in order to obtain the total energy  
156 envelopes. An average crustal velocity model was used to predict P and S wave onsets on  
157 envelopes and then based on this information: (i) the noise level prior to the P-wave onset was  
158 eliminated (ii) S-wave window was determined starting at 3s prior to and 7 s afterwards S-  
159 wave onset as this allowed to include all direct S-wave energy, (iii) starting at the end of the  
160 S-wave window, a coda window of 100s at maximum was determined. Length of coda  
161 windows can be shorter when signal-to-noise ratio (SNR) is less than 2.5 or when there are  
162 coda waves from two earthquakes (e.g. because of an aftershock sequence) within the same  
163 analysis window, which can cause another rise instead of a decline in the envelope. We omit  
164 the earthquakes with less than 10 s of coda length from our database. Taking into account of  
165 these criteria, finally coda waveforms extracted from 6541 source-receiver pairs were used for  
166 further data process.

167

#### 168 *4. Method*

169 We adopted an inversion procedure that was originally developed by Sens-Schönfelder and  
170 Wegler (2006) and later modified by Eulenfeld and Wegler (2016). The forward part, which  
171 involves calculation of energy density for a specific frequency band under assumption of an  
172 isotropic source, is expressed in Sens-Schönfelder and Wegler (2006) as follows:

$$173 \quad E_{mod}(t, r) = WR(r)G(t, r, g)e^{-bt} \quad (1)$$

174

175 where  $W$  gives source term and it is frequency dependent.  $R(r)$  indicates the energy site  
 176 amplification factor and  $b$  is intrinsic attenuation parameter.  $G(t, r, g)$  represents Green's  
 177 function that includes scattered wave field as well as direct wave and its expression is given  
 178 by Paasschens (1997) as follows:

$$179 \quad G(t, r, g) = e^{(-v_0 t g_0)} \left[ \frac{\delta(r - v_0 t)}{4\pi r^2} + \left( \frac{4\pi v_0}{3g_0} \right)^{-\frac{3}{2}} t^{-\frac{3}{2}} \times \left( 1 - \frac{r^2}{v_0^2 t^2} \right)^{\frac{1}{8}} K \left( v_0 t g_0 \left( 1 - \frac{r^2}{v_0^2 t^2} \right)^{\frac{3}{4}} \right) H(v_0 t - r) \right] \quad (2)$$

181 Here the term within Dirac delta function represents direct wave and other term indicates  
 182 scattered waves.  $v_0$  describes the mean S-wave velocity while  $g_0$  is the scattering coefficient.

183 Possible discrepancy between predicted (Eq. 1) and observed energy densities for each event  
 184 at each station with  $N_{ij}$  time samples (index  $k$ ) in a specific frequency band can be minimized  
 185 using:

$$187 \quad \epsilon(g) = \sum_{i,j,k}^{N_S, N_E, N_{ij}} (\ln E_{ijk}^{obs} - \ln E_{ijk}^{mod}(g))^2 \quad (3)$$

189 Here, the number of stations (index  $i$ ) and events (index  $j$ ) are shown by  $N_S$  and  $N_E$ ,  
 190 respectively. Optimization of  $g$  will be achieved by fulfilling following equality:

$$192 \quad \ln E_{ijk}^{obs} = \ln E_{ijk}^{mod} \quad (4) \quad \text{or}$$

$$194 \quad \ln E_{ijk}^{obs} = \ln G(t_{ijk}, r_{ijk}, g) + \ln R_i + \ln W_j - b t_{ijk} \quad (5)$$

195 Equation 5 simply define an overdetermined inversion problem with  $\sum_{i,j} N_{ij}$  number equation

196 systems and with  $N_S + N_E + 1$  variables and thus  $b$ ,  $R_i$ , and  $W_j$  can be solved via a least-  
197 squares technique.  $\epsilon(g)$  can be defined as sum over the squared residuals of the solution. As  
198 can be seen from equation 1 that there is an obvious trade-off between  $R_i$  and  $W_j$ , which we  
199 can manage by fixing the geometrical mean of  $R_i$  to 1 ( $\prod R_i = 1$ ). Equation 1 also implies  
200 rather moderate trade-off between  $W_j$  and  $b$ . Trade-off between  $g$  and other inverted  
201 parameters are usually small since this parameter is fixed through the energy ratio of the  
202 direct S-wave and the level of the coda-waves (Gaebler et al., 2018).

203 Eulenfeld and Wegler (2016) present a simple recipe to perform the inversion:

204 (i) Calculate Green's functions through the analytic approximation of the solution for 3-D  
205 isotropic radiative transfer (e.g. Paasschens 1997; Sens-Schönfelder and Wegler, 2006) by  
206 using fixed scattering parameters and minimize equation 5 to solve for  $b$ ,  $R_i$ , and  $W_j$  via a  
207 weighted least-squares approach.

208 (ii) Calculate  $\epsilon(g)$  using equation 3.

209 (iii) Repeat (i) and (ii) by selecting different  $g$  to find the optimal parameters  $g$ ,  $b$ ,  $R_i$  and  $W_j$   
210 that finally minimize the error function  $\epsilon$ .

211 In Fig. 3 an example for the minimization process that was applied at five different frequency  
212 bands is displayed for one selected event at recorded stations of the CD-CAT project.

213 Minimization described above for different frequencies will yield unknown spectral source  
214 energy term,  $W_j$  as well as site response,  $R_i$  and attenuation parameters,  $b$ , and  $g$  that will  
215 satisfy optimal fitting between observed and predicted coda wave envelopes. Example for this  
216 fitting can be seen in Figure 4. The present study deals with frequency dependency of  $W_j$   
217 since this information can be later useful to obtain source displacement spectrum and thus

218 seismic moment and moment magnitudes of analyzed earthquakes using the formula of the *S*-  
 219 wave source displacement spectrum for a double-couple source in the far-field, which is given  
 220 by Sato et al. (2012):

$$221 \quad \omega M(f) = \sqrt{\frac{5\rho_0 v_0^5 W}{2\pi f^2}} \quad (6)$$

222 where  $W$  indicates the radiated *S*-wave energy at a center frequency  $f$  while  $v_0$  and  $\rho_0$   
 223 represent the mean *S*-wave speed and medium density, respectively.

224 The relation between the obtained source displacement spectrum and seismic moment value  
 225 was earlier described in Abercrombie (1995) by:

$$226 \quad \omega M(f) = M_0 \left(1 + \left(\frac{f}{f_c}\right)^{\gamma n}\right)^{-\frac{1}{\gamma}} \quad (7)$$

227 where  $n$  is related to the high-frequency fall-off and  $\gamma$  is known as shape parameter that  
 228 controls the sharpness of spectrum at corner frequency between the constant level  $M_0$  (low  
 229 frequency part) and the fall-off with  $f^{-n}$  (high frequency part). Taking the logarithm of  
 230 equation 7 gives:

231

$$232 \quad \ln \omega M(f) = \ln M_0 - \frac{1}{\gamma} \ln \left(1 + \left(\frac{f}{f_c}\right)^{\gamma n}\right) \quad (8)$$

233

234 Eq. 8 describes an optimization problem where the observed source displacement spectrum  
 235 data (left-hand side) can be inverted for four unknown source parameters,  $M_0$ ,  $\gamma$ ,  $n$ , and  $f_c$   
 236 (right-hand side) in a simultaneous least-squares inversion scheme. Finally moment  
 237 magnitude,  $M_w$  can be calculated from modeled source parameters, seismic moment,  $M_0$   
 238 using a formula given by Hanks and Kanamori (1979):

239

240 
$$M_w = \frac{2}{3} \log_{10} M_0 - 10.7 \quad (9)$$

241

242 *5. Results and Discussions*

243 *5.1 Coda wave source spectra*

244 Figure 5 displays observed values of source spectra established by inserting inverted spectral  
245 source energy term  $W$  at each frequency in Eq. 6 for all analyzed events. Each curve in this  
246 figure represents the model spectrum estimate based on the inversion procedure described in  
247 the previous section. Modeled spectrum characteristics computed for 487 local earthquakes  
248 whose geographical distribution is presented in Figure 2 suggest, in general, that we were able  
249 to obtain typically expected source displacement spectrum with a flat region around the low  
250 frequency limit and a decaying behaviour above a corner frequency.

251

252 Owing to the multiple-scattering process within small scale heterogeneities that makes coda  
253 waves gain an averaging nature, the variation in coda amplitudes due to differences in source  
254 radiation pattern and path effect are reduced (Walter et al., 1995; Mayeda et al., 2003).  
255 Eulenfeld and Wegler (2016) found that radiation pattern would have only a minor influence  
256 on the S-wave coda while it might disturb attenuation models inferred from the direct S-wave  
257 analyses unless the station distribution relative to the earthquakes indicates a good azimuthal  
258 coverage.

259

260 Conventional approaches (e.g. Abercrombie, 1995; Kwiatek et al., 2011) to estimate source  
261 parameters such as corner frequency, seismic moment, high-frequency fall-off through fitting  
262 of observed displacement spectra observed at a given station in an inversion scheme could be  
263 misleading since these methods usually: (i) assume a constant value of attenuation effect (no  
264 frequency variation) defined by a factor  $\exp(-\pi f t Q^{-1})$  over the spectrum, (ii) and assume

265 omega-square model with a constant high-frequency fall-off parameter,  $n=2$ . Following Sens-  
266 Schönfelder and Wegler (2006) and Eulenfeld and Wegler (2016), however, we estimate  
267 attenuation parameters (intrinsic and scattering) separately within a simultaneous inversion  
268 procedure in which high-frequency fall-off parameter varies. This is fairly consistent with  
269 early studies (e.g. Ambeh and Fairhead, 1991; Eulenfeld and Wegler, 2016) where significant  
270 deviations from the omega square model ( $n>3$ ) were reported implying that the omega-square  
271 model as a source model for small earthquakes must be reconsidered in its general  
272 acceptance. Earlier it has been well-observed that the source spectra, especially, for large  
273 earthquakes could be better explained by models of two corner frequencies (e.g.,  
274 Papageorgiou and Aki, 1983; Joyner, 1984; Atkinson, 1990). Recently, Denolle et al. (2016)  
275 observed that conventional spectral model of a single-corner frequency and high-frequency  
276 fall-off rate could not explain P wave source spectra of thrust earthquakes with magnitude  
277  $M_w$  5.5 and above. Instead, they suggested the double-corner-frequency model for large  
278 global thrust earthquakes with a lower corner frequency related to source duration and with an  
279 upper corner frequency suggesting a shorter time scale unrelated to source duration, which  
280 exhibits its own scaling relation. Uchide and Imanishi (2016) reported similar differences  
281 from the omega-square model would be valid also for smaller earthquakes by using spectral  
282 ratio technique that involves empirical Green's function (EGF) events to avoid having a  
283 complete knowledge of path and site effects for shallow target earthquakes ( $M_w$  3.2–4.0) in  
284 Japan. The source spectra for many of the target events in their study suggested a remarkable  
285 discrepancy from the omega-square model for relatively small earthquakes. They explained  
286 such differences by incoherent rupture due to heterogeneities in fault properties and applied  
287 stress, the double-corner-frequency model, and possibility of a high-frequency falloff  
288 exponent value slightly higher than 2. In our case, the smallest event was with  $M_w$ -coda  
289 larger than 2.0, thus we had no chance to make a similar compared to that of Eulenfeld and



290 Wegler (2016). However, high-frequency fall-off parameters varied from  $n=0.5$  to  $n=4$ . A  
291 notable observation in the distribution of  $n$  was  $n=2$  or  $n=2.5$  would be better explained for  
292 earthquakes with  $M_W\text{-coda} > 4.0$  whereas the smaller magnitudes exhibited more scattered  
293 pattern of variation in  $n$  (Figure 7). Eulenfeld and Wegler (2016) claimed that the use of  
294 separate estimates of the attenuation or correction for path effect via empirically determined  
295 Green's function would be better strategy in order to invert station displacement spectra for  
296 source parameters. This is mainly because smaller earthquakes (with  $n > 2$ ), in particular,  
297 assuming omega-square model can distort the estimates of corner frequency and even seismic  
298 moment especially in regions where  $Q$  is strongly frequency dependent. Thus, independent  
299 estimates of  $Q$  during station displacement spectra inversions for source parameters must be  
300 taken into account or the influence of path such as attenuation must be removed via  
301 empirically determined Green's functions (Eulenfeld and Wegler, 2016).

302

### 303 *5.2 Coda wave-derived magnitude vs. $M_L$ catalogue magnitude*

304 A scatter plot between catalogue magnitudes based on local magnitudes ( $M_L$ ) and our coda-  
305 derived magnitudes ( $M_W\text{-coda}$ ) that are inferred from resultant frequency dependent source  
306 displacement spectra and thus seismic moment (e.g. Eq. 9) is shown in Fig. 6. Such  
307 comparison suggests an overall coherency between both types of magnitudes. This implies  
308 that a very simple model of a first-order approximation for S-wave scattering with isotropic  
309 acoustic radiative transfer approach can be efficient to link the amplitude and decaying  
310 character of coda wave envelopes to the seismic moment of the source.

311

312 In the present study, a linear regression analyses performed between  $M_W\text{-coda}$  and  $M_L$   
313 magnitudes (Fig. 5) resulted in an empirical formula that can be employed to convert local

314 magnitudes into coda-derived moment magnitude calculation of local earthquakes in this  
315 region:

316

$$317 \quad M_{W-coda} = 1.1655 \pm 0.0337 \times M_L - 0.7085 \pm 0.0128 \quad (10)$$

318

319 Bakun and Lindh (1977) empirically described the linear log seismic moment-local  
320 magnitude relation between seismic moments ( $M_0$ ) and local magnitudes ( $M_L$ ) for  
321 earthquakes near Oroville, California. Beside this several other studies investigated to find an  
322 optimum relation between  $M_W$  and  $M_L$  by implementing linear and/or non-linear curve-fitting  
323 approaches. Malagnini and Munafò (2018) proposed two different linear fits separated by a  
324 crossover  $M_L=4.31$  could represent  $M_L$ - $M_W$  data points obtained from earthquakes of the  
325 central and northern Apennines, Italy. Several coefficient of regression analyses in their fits  
326 account for the combined effects of source scaling and crustal attenuation as well as regional  
327 attenuation, focal depth, and rigidity at source. Goertz-Allmann et al. (2011), for instance,  
328 introduced hybrid type of scaling relation that is linear below  $M_L$  2 and above  $M_L$  4 and a  
329 quadratic relation in between ( $2 \leq M_L \leq 4$ ) for earthquakes in Switzerland detected between  
330 1998 and 2009. Edwards and Rietbrock (2009) employed a second-order polynomial equation  
331 to relate local magnitudes routinely reported in the Japan Meteorological Agency (JMA)  
332 magnitude and moment magnitude. More recently, using multiple spectral ratio analyses  
333 Uchide and Imanishi (2018) estimated relative moment magnitudes for the Fukushima  
334 Hamadori and the northern Ibaraki prefecture areas of Japan and reported a quadratic form of  
335 correlation between JMA magnitudes and moment magnitudes. Resultant empirical curve in  
336 Uchide and Imanishi (2018) implied a considerable discrepancy between the moment  
337 magnitudes and the JMA magnitudes, with a slope of 1/2 for microearthquakes suggesting

338 possible biases introduced by anelastic attenuation and the recording by a finite sampling  
339 interval.

340

341 Apparent move-out in Fig. 5 and Eq. 10, presumably stems from the use of different  
342 magnitude scales for comparison. Conventional magnitudes scales such as  $M_L$ , mb inferred  
343 from phase amplitude measurements are seemingly sensitive to attenuation and 2D variation  
344 along the path (Pasyanos et al., 2016). Unlike local magnitude scales, seismic moment-based  
345 moment magnitude ( $M_W$ ) essentially represents a direct measure of the strength of an  
346 earthquake caused by fault slip and is estimated from relatively flat portion of source spectra  
347 at lower frequencies that can be less sensitive to the near surface attenuation effects. The  
348 consistency between coda-derived moment magnitude and local magnitude scales for the  
349 earthquakes with  $M_{W-coda} > 3.0$  indicates that our non-empirical approach successfully  
350 worked in this tectonically complex region. This observation is anticipated, for relatively  
351 large earthquakes, since more energy will be characteristic at lower frequencies. We  
352 observed similar type of consistency in early studies that investigate source properties of local  
353 and regional earthquakes based on empirical coda methods with simple 1-D radially  
354 symmetric path correction (e.g. Eken et al., 2004; Gök et al., 2016). Coda waves-derived  
355 source parameters were obtained with high-precision in Mayeda et al. (2005), Phillips et al.  
356 (2014), Pasyanos et al. (2016) following the use of 2-D path-corrected station techniques to  
357 consider the amplitude-distance relationships. Observable outliers in Figure 5, for the events  
358 with less than  $M_w$  3.5, however, can be attributed to the either possible biases on local  
359 magnitude values taken from the catalogue or small biases on our intrinsic ( $Q_i^{-1}$ ) and  
360 scattering ( $Q_s^{-1}$ ) attenuation terms. One another possible contribution to such mismatch might  
361 be associated to the influences of mode conversions between body and surface waves or

362 surface-to-surface wave scattering that are not restricted to low frequencies ( $<1\text{Hz}$ ) (Sens-  
363 Schönfelder and Wegler, 2006).

364

## 365 *6. Conclusions*

366 This study provides moment magnitude estimates as a direct physical measure of the seismic  
367 energy for local earthquakes with magnitudes  $2.0 \leq M_L \leq 5.2$  recorded at 69 seismic stations  
368 in central Anatolia. The source displacement spectra were obtained following the application  
369 of a coda wave modeling procedure that employs a simultaneous optimization of source, path,  
370 and site specific terms by fitting physically derived synthetic coda envelope and observed  
371 coda envelopes. The Radiative Transfer Theory was used for analytic expression of synthetic  
372 coda wave envelopes. Overall consistency between  $M_w$ -coda and  $M_L$  suggests that our non-  
373 empirical approach successfully worked in this tectonically complex region. Variation of  
374 high-frequency fall-off parameter indicated that for smaller earthquakes ( $n > 2$ ) assuming  
375 omega-square model can distort the estimates of corner frequency and even seismic moment  
376 especially in regions where  $Q$  is strongly frequency dependent. Since the present study mainly  
377 focuses on source properties of local earthquakes in the study area, scattering and intrinsic  
378 attenuation properties that are other products of our coda envelope fitting procedure will be  
379 examined in details within a future work. Finally, a linear regression analysis resulted in an  
380 empirical relation developed between  $M_w$ -coda and  $M_L$ , which will be a useful tool in the  
381 future to quickly convert catalogue magnitudes into moment magnitudes for local earthquakes  
382 in the study area.

383

## 384 *Data and resources*

385 The python code used for carrying out the inverse modeling is available under the permissive  
386 MIT license and is distributed at <https://github.com/trichter/qopen>. We are grateful to the IRIS

387 Data Management Center for maintaining, archiving and making the continuous broadband  
388 data used in this study open to the international scientific community. The KOERI is specially  
389 thanked for providing publicly open local seismicity catalogues.

390

#### 391 *Acknowledgement*

392 The facilities of IRIS Data Services, and specifically the IRIS Data Management Center, were  
393 used for access to waveforms, related metadata, and/or derived products used in this study.  
394 IRIS Data Services are funded through the Seismological Facilities for the Advancement of  
395 Geoscience and EarthScope (SAGE) Proposal of the National Science Foundation under  
396 Cooperative Agreement EAR-1261681. Data for the CD-CAT experiment  
397 ([https://doi.org/10.7914/SN/YB\\_2013](https://doi.org/10.7914/SN/YB_2013)) are available from the IRIS Data Management Center  
398 at <http://www.iris.edu/hq/>. Tuna Eken acknowledge financial support from Alexander von  
399 Humboldt Foundation (AvH) towards computational and peripherals resources. I am grateful  
400 to the Topical Editor Charlotte Krawczyk for handling the revision process and Takahiko  
401 Uchide and Ludovic Margerin for their valuable opinions on the improvement of manuscript.

#### 402 *References*

- 403 Abercrombie, R.E.: Earthquake source scaling relationships from  $-1$  to  $5$  ML using  
404 seismograms recorded at 2.5-km depth, *J. geophys. Res.*, 100(B12), 24 015–24 036,  
405 1995.
- 406 Aki, K., and Chouet., B.: Origin of coda waves: Source, attenuation, and scattering effects, *J.*  
407 *Geophys. Res.* 80, 3322–3342, 1975.
- 408 Atkinson, G. M.: A comparison of eastern North American ground motion observations with  
409 theoretical predictions, *Seismol. Res. Lett.* 61, 171–180, 1990.

410 Bakun, W.H. and Lindh, A.G.: Local Magnitudes, Seismic Moments, and Coda Durations for  
411 Earthquakes Near Oroville, California, Bulletin of the  
412 Seismological Society of America. Vol.67, No.3, pp. 615-629, 1977.

413 Bozkurt, E.: Neotectonics of Turkey—A synthesis: *Geodinamica Acta*, v. 14, p. 3–30, 2001.

414 Bulut, F., Bohnhoff, M., Eken, T., Janssen, C., Kılıç, T., and Dresen, G.: The East Anatolian  
415 fault zone: Seismotectonic setting and spatiotemporal characteristics of seismicity based  
416 on precise earthquake locations: *Journal of Geophysical Research*, v. 117, B07304,  
417 <https://doi.org/10.1029/2011JB008966>, 2012.

418 Çemen, I., Göncüoğlu, M.C., and Dirik, K.: Structural evolution of the Tuz Gölü basin in central  
419 Anatolia, Turkey: *Journal of Geology*, v. 107, p. 693–706, <https://doi.org/10.1086/314379>, 1999.

421 Çubuk Y, Yolsal-Çevikbilen S, Taymaz, T.: Source parameters of the 20052008 Balıkesir (central Turkey) earthquakes: Implications for the internal deformation of the Anatolian  
422 plate. *Tectonophysics* 635(Supplement C) :125 – 153, 2014.

424 Denolle, M. A., and Shearer, P.M.: New perspectives on self-similarity for shallow thrust  
425 earthquakes, *J. Geophys. Res. Solid Earth*, 121, 6533–6565, 2016.

426 Edwards, B., & Rietbrock, A.: A comparative study on attenuation and source-scaling relations  
427 in the Kantō, Tokai, and Chubu regions of Japan, using data from Hi-net and KiK-net.  
428 *Bulletin of the Seismological Society of America*, 99, 2435–2460, 2009.

429 Eken, T., Mayeda, K., Hofstetter, A., Gök, R., Orgülü, G. and Turkelli, N.: An application of the  
430 coda methodology for moment-rate spectra using broadband stations in Turkey.  
431 *Geophys. Res. Lett*, 31, L11609, 2004.

432 Eulenfeld, T. and Wegler, U.: Measurement of intrinsic and scattering attenuation of shear  
433 waves in two sedimentary basins and comparison to crystalline sites in Germany,  
434 *Geophys J Int.*, 205(2):744-757, 2016.

435 Eulenfeld, T. and Wegler, U.: Crustal intrinsic and scattering attenuation of high-frequency  
436 shear waves in the contiguous United States. *J Geophys., Res*, 122, 2017.

437 Favreau, P., and Archuleta, R.J.: Direct seismic energy modelling and application to the 1979  
438 Imperial Valley earthquake, *Geophys. Res. Lett.*, 30, 1198, 2003.

439 Gaebler, P.J., Eulenfeld, T. & Wegler, U.: Seismic scattering and absorption parameters in the  
440 W-Bohemia/Vogtland region from elastic and acoustic radiative transfer theory,  
441 *Geophys. J. Int.*, 203(3), 1471–1481, 2015.

442 Gaebler, P.J., Eken, T., Bektaş, H.Ö, Eulenfeld, T., Wegler, U., Taymaz, T.: Imaging of Shear  
443 Wave Attenuation Along the Central Part of the North Anatolian Fault Zone, Turkey,  
444 submitted to the *Journal of Seismology*, 2018.

445 Goertz-Allmann, B. P., Edwards, B., Bethmann, F., Deichmann, N., Clinton, J., Fäh, D., &  
446 Giardini, D.: A new empirical magnitude scaling relation for Switzerland. *Bulletin of the*  
447 *Seismological Society of America*, 101, 3088–3095, 2011.

448 Gök, R., Kaviani, A., Matzel, E. M., Pasyanos, M. E., Mayeda, K., Yetirmishli, G., El-Hussain,  
449 I., Al-Amri, A., Al-Jeri, F., Godoladze, T., Kalafat, D., Sandvol, E. A., and Walter,  
450 W.R.: Moment Magnitudes of Local/Regional Events from 1D Coda Calibrations in the  
451 Broader Middle East Region. *Bull Seismol Soc Am.*, 106(5):1926-1938, 2016.

452 Gusev, A.A. & Abubakirov, I.R.: Simulated envelopes of non-isotropically scattered body  
453 waves as compared to observed ones: another manifestation of fractal heterogeneity,  
454 *Geophys. J. Int.*, 127(1), 49–60, 1996.

455 Hanks, T.C. and Kanamori, H.: A moment magnitude scale, *J. Geophys., Res.*, 84, 2348–2350,  
456 1979.

457 Izgi, G., Eken, T., Gaebler, P., and Taymaz, T.: Frequency-Dependent Shear Wave Attenuation  
458 Along the Western Part of the North Anatolian Fault Zone, Geophysical Research  
459 Abstracts, Vol. 20, EGU2018-629-2, 2018.

460 Kaymakci, N. Inceöz, M. Ertepinar, P.: 3D architecture and Neogene evolution of the Malatya  
461 Basin: inferences for the kinematics of the Malatya and Ovacik Fault Zones. Turkish  
462 Journal of Earth Sciences, 15, 123-154, 2006.

463 Kwiatek, G., Plenkers, K. & Dresen, G.: 2011. Source parameters of pico-seismicity recorded at  
464 Mponeng Deep Gold Mine, South Africa: implications for scaling relations, Bull. seism.  
465 Soc. Am., 101(6), 2592–2608, 2011.

466 Malagnini, L., Mayeda, K., Akinci, A., and Bragato, P. L.: Estimating absolute site effects,  
467 Bull. Seismol. Soc. Am. 94, no. 4, 1343–1352, 2004.

468 Malagnini, L., and Munafò, I.: On the Relationship between  $M_L$  and  $M_w$  in a Broad Range: An  
469 Example from the Apennines, Italy, Bulletin of the Seismological Society of America,  
470 Vol. 108, No. 2, pp. 1018–1024, 2018.

471 Mayeda, K., and Walter, W.R.: Moment, energy, stress drop, and source spectra of western  
472 United States earthquakes from regional coda envelopes, J. Geophys. Res. 101, 11,195–  
473 11,208, 1996.

474 Mayeda, K., Hofstetter, A., O’Boyle, J.L., and Walter, W.R.: Stable and transportable regional  
475 magnitudes based on coda-derived moment-rate spectra, Bull. Seismol. Soc. Am. 93,  
476 224–239: 2003.

477 Mayeda, K., Malagnini, L., Phillips, W. S., Walter, W. R., and Dreger, D.: 2D or not 2D, that is  
478 the question: A Northern California Test. Geophysical Research Letters, 32(12), 2005.

479 Morasca, P., Mayeda, K., Malagnini, L. and Walter, W.R.: Coda and direct-wave attenuation  
480 tomography in northern Italy, Bull Seismol Soc Am., v. 98, pages, 1936-1946, 2004.



481 Morasca, P., Mayeda, K., Gök, R., Phillips, W.S., and Malagnini, L.: Coda-derived source  
482 spectra, moment magnitudes and energy-moment scaling in the western Alps, *Geophys.*  
483 *J. Int.*, 160, 263–275, 2008.

484 Paasschens, J.: Solution of the time-dependent Boltzmann equation, *Phys. Rev. E*, 56(1), 1135–  
485 1141, 1997.

486 Papageorgiou, A., and Aki, K.: A specific barrier model for the quantitative description of  
487 inhomogeneous faulting and the prediction of strong ground motion I: Description of the  
488 model, *Bull. Seismol. Soc. Am.*, 73(3), 693–722, 1983.

489 Pasyanos, M. E., R. Gök, and Walter, W.R.: 2-D variations in coda amplitudes in the Middle  
490 East. *Bull. Seismol. Soc. Am.* 106, no. 5, 2016.

491 Phillips, W. S., Mayeda, K. M., and Malagnini, L.: How to invert multi-band, regional phase  
492 amplitudes for 2-d attenuation and source parameters: Tests using the usarray. *Pure and*  
493 *Applied Geophysics*, 171(3):469-484, 2014.

494 Portner, D.E., Delph, J.R., Biryol, C.B., Beck, S.L., Zandt, G., Özacar, A.A., Sandvol, E., and  
495 Türkelli, N.: Subduction termination through progressive slab deformation across  
496 Eastern Mediterranean subduction zones from updated P-wave tomography beneath  
497 Anatolia, *Geosphere*, 14(3): 907-925, 2018.

498 Przybilla, J. and Korn, M.: Monte Carlo simulation of radiative energy transfer in continuous  
499 elastic random mediathree-component envelopes and numerical validation. *Geophys J*  
500 *Int* , 173(2):566-576, 2008.

501 Rautian, T.G. & Khalturin, V.I.: The use of the coda for determination of the earthquake source  
502 spectrum, *Bull. Seism. Soc. Am.*, 68(4), 923–948, 1978.

503 Sato, H. and Fehler, M.C.: *Seismic Wave Propagation and Scattering in the Heterogeneous*  
504 *Earth*, Springer-Verlag, New York, 1998.

505 Sato, H., Fehler, M.C. & Maeda, T. Seismic Wave Propagation, and Scattering in the  
506 Heterogeneous Earth, 2nd edn, Springer: 2012.

507 Sens-Schönfelder, C. and Wegler, U.: Radiative transfer theory for estimation of the seismic  
508 moment. *Geophys J Int*, 167(3):1363-1372.

509 Taymaz, T., Jackson, J., Westaway, R.: Earthquake mechanisms in the Hellenic Trench near  
510 Crete. *Geophys. J. Int.*102, 695–731, 1990.

511 Taymaz, T., Westaway, R., Reilinger, R.: Active faulting and crustal deformation in the eastern  
512 Mediterranean Region. *Spec. Issue Tectonophys.* 391 (1-4), 1–9. [http://](http://dx.doi.org/10.1016/j.tecto.2004.07.005)  
513 [dx.doi.org/10.1016/j.tecto.2004.07.005](http://dx.doi.org/10.1016/j.tecto.2004.07.005), 2004.

514 Tchalenko, J. S.: Similarities between shear zones of different magnitudes. *Geol. Soc. Am.*  
515 *Bull.*, 81, 1625–1640, 1970.

516 Uchide, T., & Imanishi, K.: Small earthquakes deviate from the omega-square model as revealed  
517 by multiple spectral ratio analysis. *Bulletin of the Seismological Society of America*,  
518 106(3), 1357–1363, 2016.

519 Uchide, T., & Imanishi, K.: Underestimation of microearthquake size by the magnitude scale of  
520 the Japan Meteorological Agency: Influence on earthquake statistics. *Journal of*  
521 *Geophysical Research: Solid Earth*, 123, 606–620, 2018.

522 Yoo, S.-H., Rhie, J., Choi, H.-S., and Mayeda, K.: Coda-derived source parameters of  
523 earthquakes and their scaling relationships in the Korean Peninsula, *Bull. Seismol. Soc.*  
524 *Am.*, 101, 2388–2398, 2011.

525 Zeng, Y., Su, F. and Aki, K.: Scattering wave energy propagation in a random isotropic  
526 scattering medium: 1. Theory, *J. Geophys. Res.*, 96(B1), 607–619, 1991.

527

528

529

530 *Figure Captions*

531 Figure 1. Major tectonic features of Turkey and its adjacent. The plate boundary data used  
532 here is taken from Bird (2003). Subduction zones are black, continental transform faults are  
533 red, continental rift boundaries are green, and spreading ridges boundaries are yellow. NAFZ,  
534 EAFZ, and DSFZ are the North Anatolian Fault, East Anatolian Fault, and the Dead Sea fault,  
535 respectively.

536

537 Figure 2. Epicentral distribution of all local events selected from the study area in the KOERI  
538 catalogue. Gray circles represent earthquakes with poor quality that are not considered for the  
539 current study while black indicates the location of local events with good quality. Red circles  
540 among these events are 487 events used in coda wave inversion since they are successful at  
541 passing quality criteria of further pre-processing procedure.

542

543 Figure 3. An example from the inversion procedure explained in chapter 3. Here coda  
544 envelope fitting optimization is performed on band-pass filtered (4-8Hz) digital recordings of  
545 an earthquake (2014 April 09,  $M_W$ -coda3.2) extracted for 7 seismic stations that operated  
546 within the CD-CAT array. Large panel at the lower left-hand side displays the error function  $\epsilon$   
547 as a function of  $g_0$ . Thick blue cross here represent the optimal value of  $g = g_0$ . Other small  
548 panels at upper and right-hand side show the least- squares solution of the weighted linear  
549 equation system for the first 6 guesses and optimal guess for  $g_0$ . The dots and gray curves  
550 indicate the ratio between energy ( $E^{\text{obs}}$ ) and the Green's function ( $G$ ) obtained for direct S-  
551 waves and observed envelopes at various stations, respectively (Please notice that during this  
552 optimization process envelopes are corrected for the obtained site corrections  $R_i$ ). The slope  
553 of linear curve at each small panel yields  $-b$  in relation to the intrinsic attenuation. The linear

554 curve has an intercept of  $W$  representing source related terms at the right-hand side of  
555 equation 5.

556

557 Figure 4. a) Results of the inversion of the 2014-April-09,  $M_W$ -coda3.2 earthquake: Sample  
558 fits between observed and calculated energy densities in the frequency band 0.5–1.0 Hz are  
559 given for 6 different stations (see upper right corner for event ID, station name, and distance  
560 to hypocenter). Note that light blue curves represent observed envelope. Smoothed observed  
561 calculated envelopes in each panel are presented by blue and red curves, respectively. Blue  
562 and red dots exhibit location of the average value for observed and calculated envelopes  
563 within the S-wave window, respectively. b) The same as in (a) obtained in the frequency band  
564 4.0–8.0 Hz.

565

566 Figure 5. All individual observed (black squares) and predicted (gray curve) source  
567 displacement spectra observed at 72 stations from 487 local earthquakes in central Anatolia.

568

569 Figure 6: Scatter plot between local magnitudes ( $M_L$ ) of analyzed events with coda waves-  
570 derived magnitudes ( $M_W$ -coda) of the same events. The outcome of a linear regression  
571 analysis yielded an empirical formula (e.g. Eq. 10) to identify the overall agreement  
572 represented by gray straight line. Yellow and red dashed lines indicate upper and lower limit  
573 of linearly fitting to that scatter.

574

575 Figure 7: Same scatter plot displayed in Fig. 6. Here color code indicates estimated high-  
576 frequency fall-off parameter for each inverted event.

577

578

579

580

581

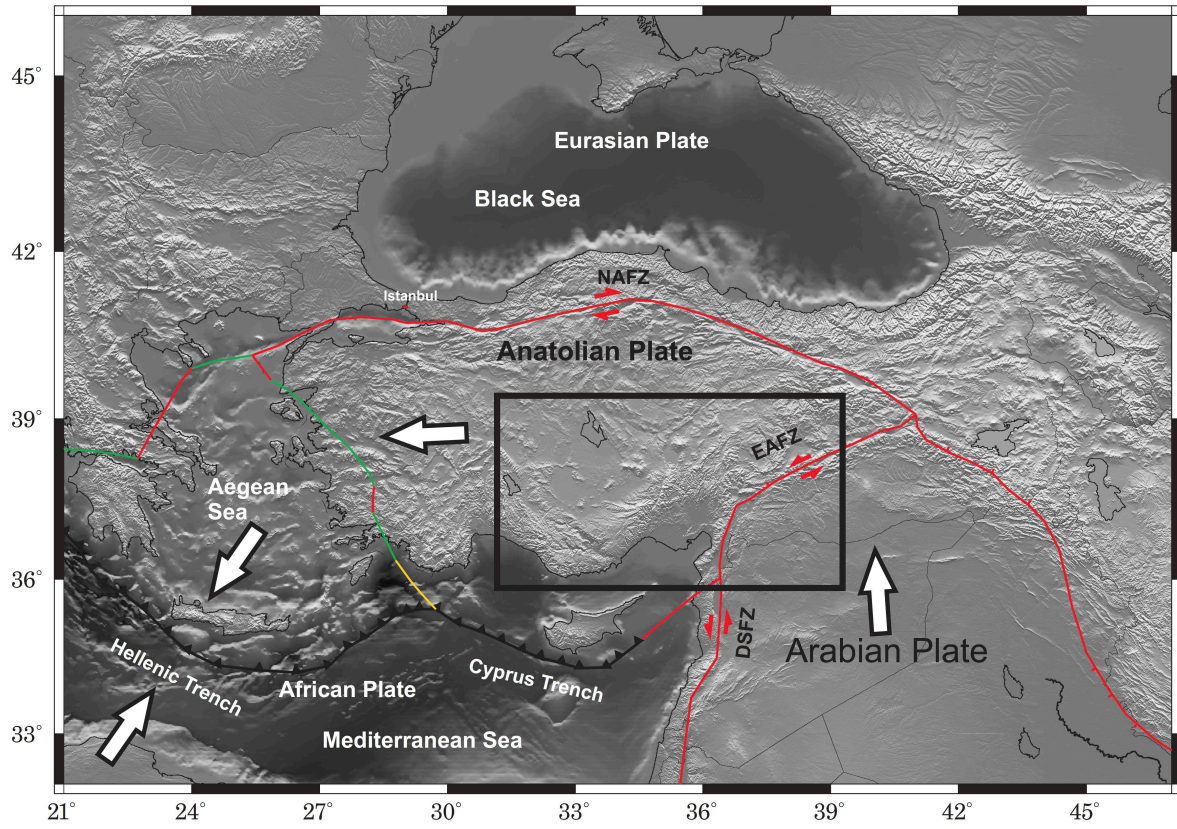

582

583

584

585 Figure 1.

586

587

588

589

590

591

592

593

594

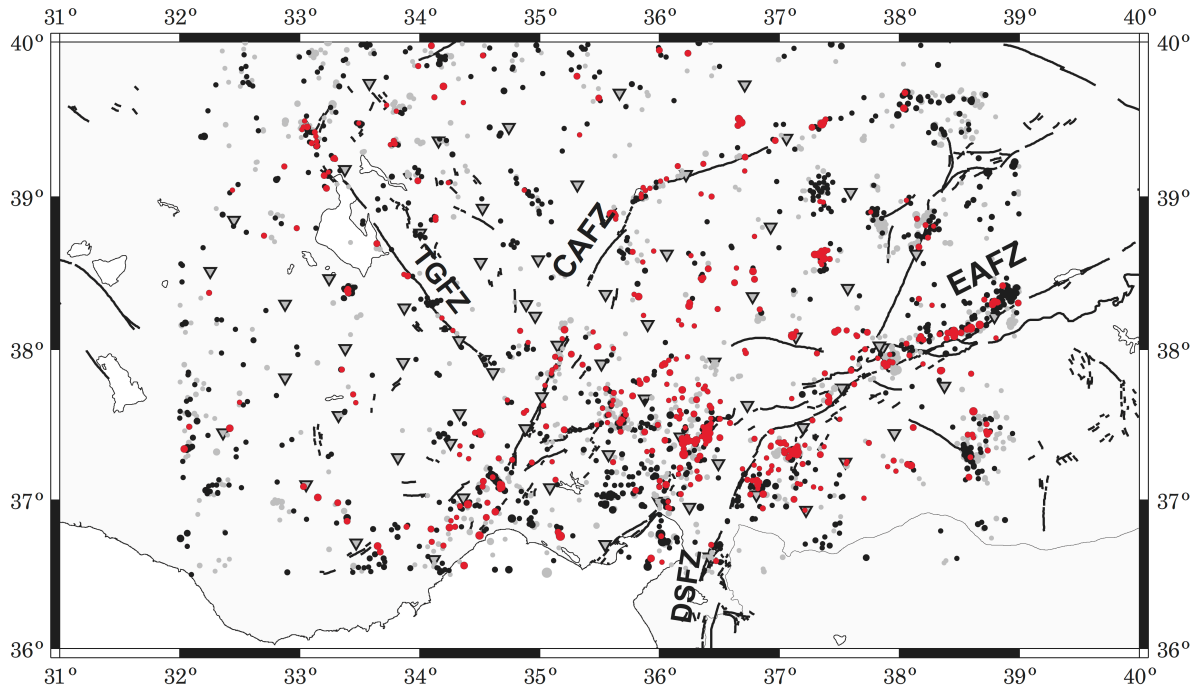

595

596 Figure 2.

597

598

599

600

601

602

603

604

605

606



607  
608  
609  
610  
611

Figure 3.



612

613

614

615

616

617

618

Figure 4.



619  
620  
621  
622  
623



Figure 5.

624  
625  
626  
627  
628  
629  
630  
631  
632  
633  
634  
635  
636  
637  
638  
639  
640  
641  
642  
643  
644

645  
646  
647  
648  
649  
650



Figure 6.

651  
652  
653  
654  
655  
656  
657  
658  
659  
660  
661  
662  
663  
664

665  
666



667  
668  
669  
670

Figure 7.
